# Supplementary material for: TGF-β Neutralization Enhances AngII-Induced Aortic Rupture and Aneurysm in Both Thoracic and Abdominal Regions
Source: PubMed Central journal article supplement (PMC4841552; doi:10.1371/journal.pone.0153811), 2016-04-22
Supplement: pone.0153811.s002.pdf [file pone.0153811.s002.pdf]

## Study #1: Rabbit IgG

| Group | Infusion | Injection (i.p.) |                     | N  |
|-------|----------|------------------|---------------------|----|
|       |          | IgG              | Dose                |    |
| 1     | AngII    | Control          | 10 mg/kg,<br>2/week | 10 |
| 2     | AngII    | TGF- $\beta$ Ab  |                     | 10 |

| Procedure          | Time (Weeks) |    |    |    |    |
|--------------------|--------------|----|----|----|----|
|                    | 0            | 1  | 2  | 3  | 4  |
| Injection – IgG    | ↑↑           | ↑↑ | ↑↑ | ↑↑ | ↑↑ |
| Infusion – AngII   |              |    |    |    |    |
| Serum TGF- $\beta$ |              |    |    |    | ↑  |
| Aortic pathologies |              |    |    |    | ↑  |
