# Supplementary material for: TGF-β Neutralization Enhances AngII-Induced Aortic Rupture and Aneurysm in Both Thoracic and Abdominal Regions
Source: PubMed Central journal article supplement (PMC4841552; doi:10.1371/journal.pone.0153811), 2016-04-22
Supplement: pone.0153811.s003.pdf [file pone.0153811.s003.pdf]

## Study #2,3: Mouse IgG

| Group | Infusion | Injection (i.p.) |                              | N  |
|-------|----------|------------------|------------------------------|----|
|       |          | IgG              | Dose                         |    |
| 1     | Saline   | Isotype Ctrl     | 0.3 or 5<br>mg/kg,<br>3/week | 10 |
| 2     | Saline   | TGF- $\beta$ Ab  |                              | 10 |
| 3     | AngII    | Isotype Ctrl     |                              | 20 |
| 4     | AngII    | TGF- $\beta$ Ab  |                              | 20 |

| Procedure                  | Time (Weeks) |     |     |     |     |
|----------------------------|--------------|-----|-----|-----|-----|
|                            | 0            | 1   | 2   | 3   | 4   |
| Injection – IgG            | ↑↑↑          | ↑↑↑ | ↑↑↑ | ↑↑↑ | ↑↑↑ |
| Infusion – Saline or AngII |              |     |     |     |     |
| Serum TGF- $\beta$         |              |     |     |     | ↑   |
| Aortic pathologies         |              |     |     |     | ↑   |
