# Supplementary material for: TGF-β Neutralization Enhances AngII-Induced Aortic Rupture and Aneurysm in Both Thoracic and Abdominal Regions
Source: PubMed Central journal article supplement (PMC4841552; doi:10.1371/journal.pone.0153811), 2016-04-22

S7 Fig

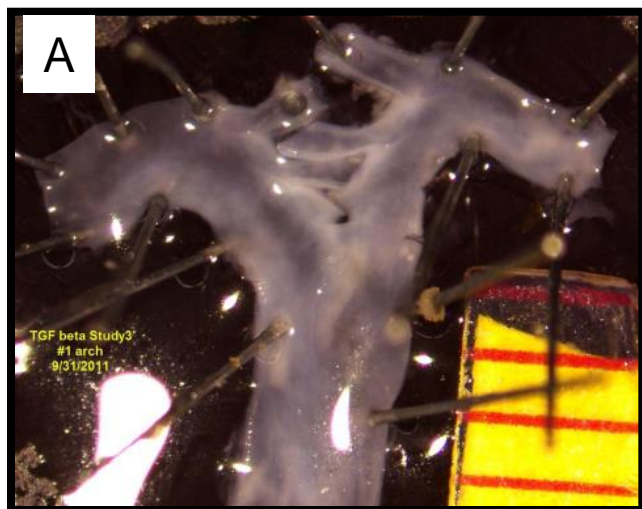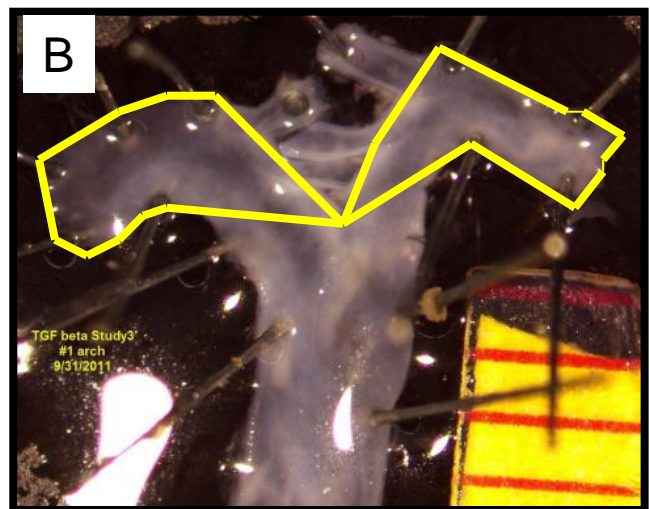

Supplement: pone.0153811.s007.pdf [file pone.0153811.s007.pdf]
