# Supplementary material for: TGF-β Neutralization Enhances AngII-Induced Aortic Rupture and Aneurysm in Both Thoracic and Abdominal Regions
Source: PubMed Central journal article supplement (PMC4841552; doi:10.1371/journal.pone.0153811), 2016-04-22
Supplement: pone.0153811.s008.pdf [file pone.0153811.s008.pdf]

Study #1: Control rabbit IgG  
(10 mg/kg, 2 times/week)  
AngII (1,000 ng/kg/min)

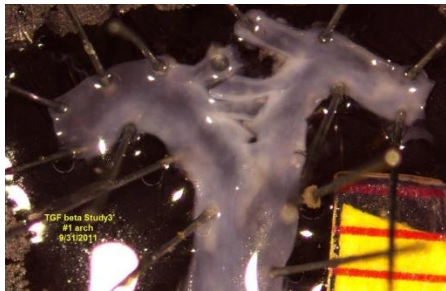

13.55 mm<sup>2</sup>

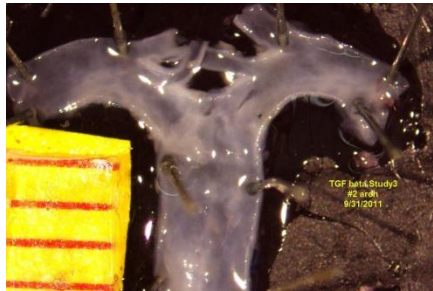

12.58 mm<sup>2</sup>

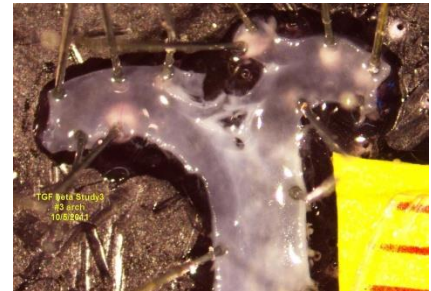

12.24 mm<sup>2</sup>

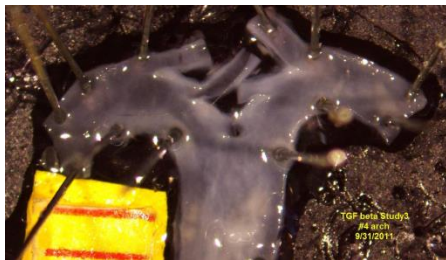

13.41 mm<sup>2</sup>

# 5: Died

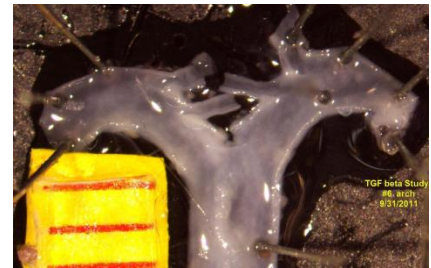

12.36mm<sup>2</sup>

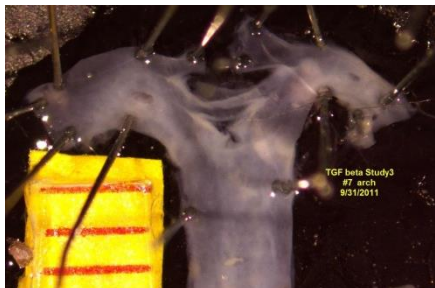

12.69 mm<sup>2</sup>

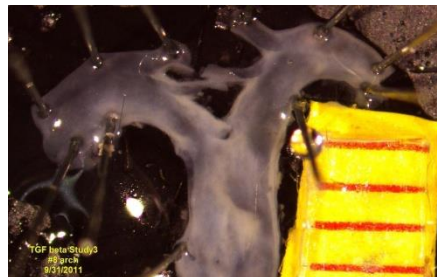

12.87 mm<sup>2</sup>

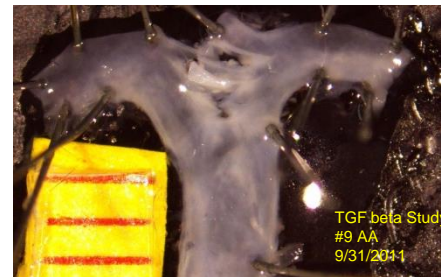

13.26 mm<sup>2</sup>

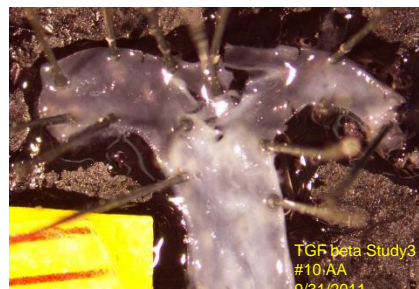

12.73 mm<sup>2</sup>

Study #1: TGF- $\beta$  rabbit IgG  
(10 mg/kg, 2 times/week)  
AngII (1,000 ng/kg/min)

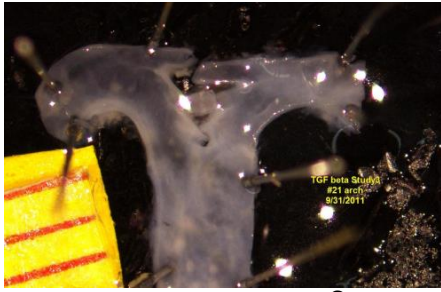

10.54 mm<sup>2</sup>

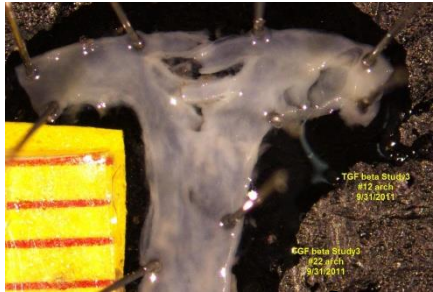

12.64 mm<sup>2</sup>

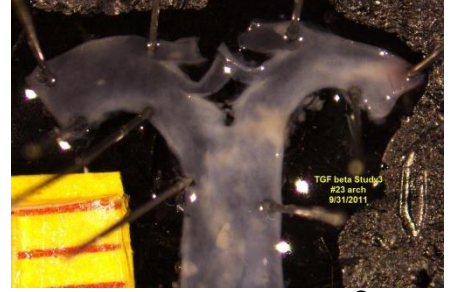

11.49 mm<sup>2</sup>

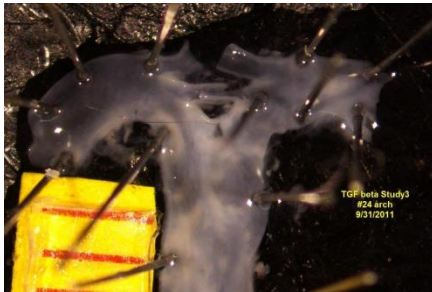

12.21 mm<sup>2</sup>

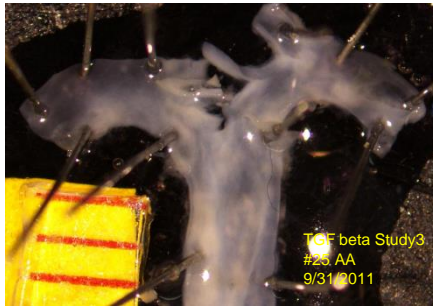

12.65 mm<sup>2</sup>

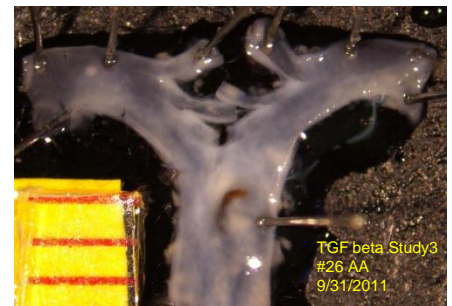

11.3 mm<sup>2</sup>

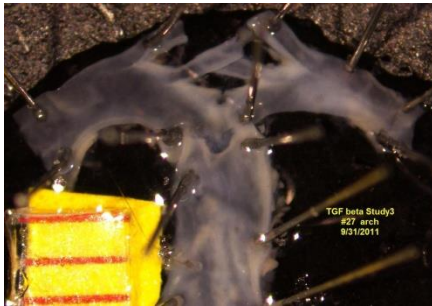

11.38 mm<sup>2</sup>

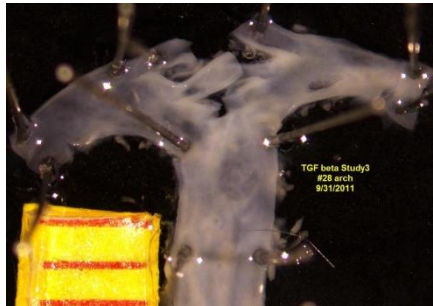

12.08 mm<sup>2</sup>

# 29: Died

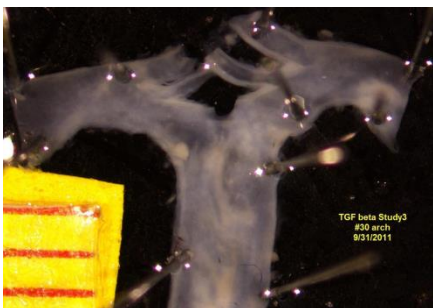

11.67 mm<sup>2</sup>
