# Supplementary material for: TGF-β Neutralization Enhances AngII-Induced Aortic Rupture and Aneurysm in Both Thoracic and Abdominal Regions
Source: PubMed Central journal article supplement (PMC4841552; doi:10.1371/journal.pone.0153811), 2016-04-22
Supplement: pone.0153811.s010.pdf [file pone.0153811.s010.pdf]

Study #2: Control, isotype-matched mouse IgG  
(5 mg/kg, 3 times/week)  
Saline-infused

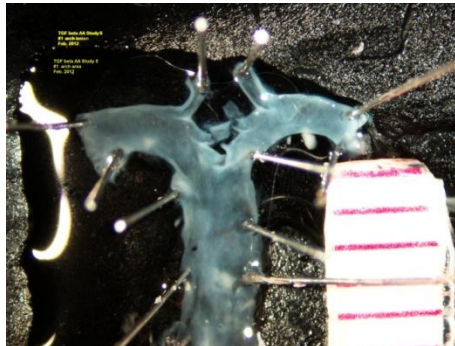

9.41 mm<sup>2</sup>

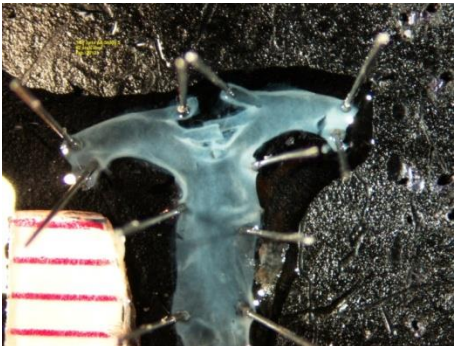

8.58 mm<sup>2</sup>

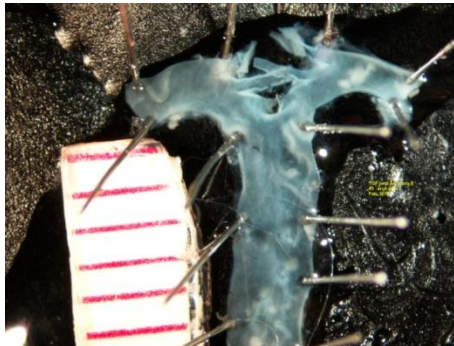

9.24 mm<sup>2</sup>

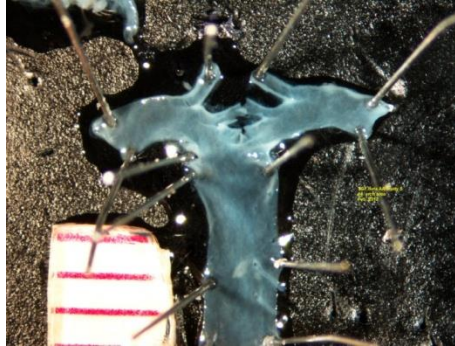

8.27 mm<sup>2</sup>

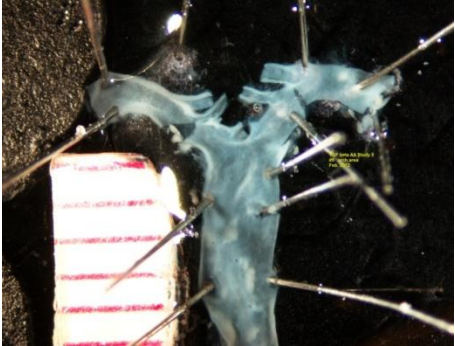

7.66 mm<sup>2</sup>

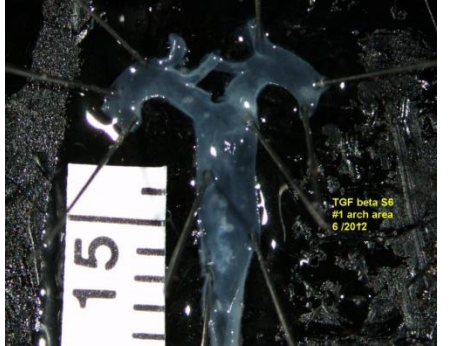

9.79 mm<sup>2</sup>

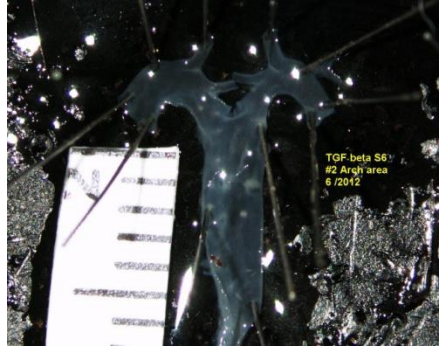

10.20 mm<sup>2</sup>

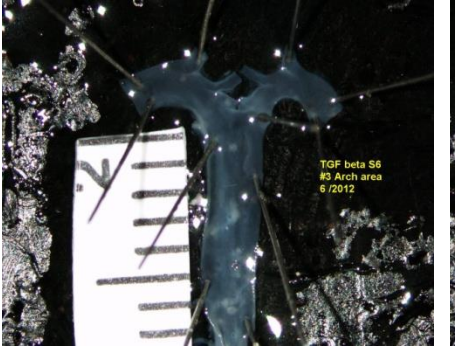

9.08 mm<sup>2</sup>

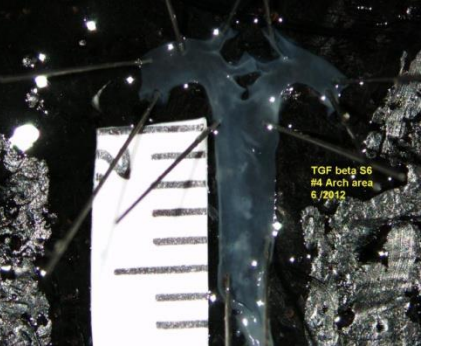

9.54 mm<sup>2</sup>

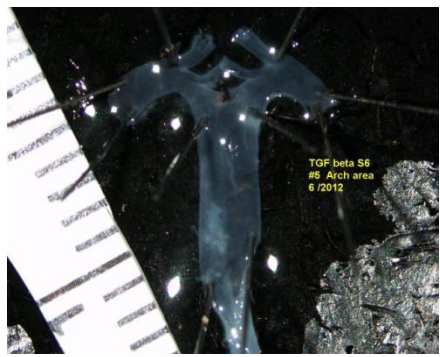

8.83 mm<sup>2</sup>

Study #2: TGF- $\beta$  mouse IgG  
(5 mg/kg, 3 times/week)  
Saline-infused

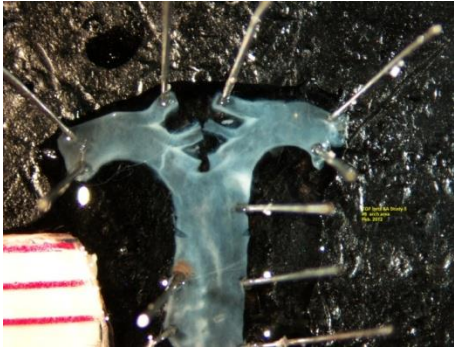

9.12 mm<sup>2</sup>

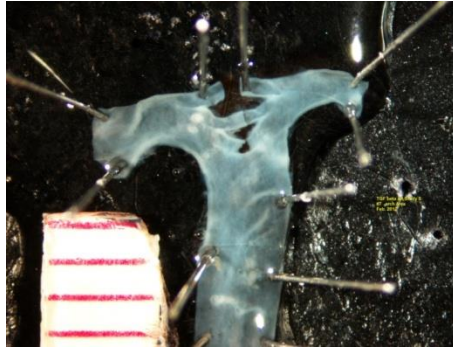

9.55 mm<sup>2</sup>

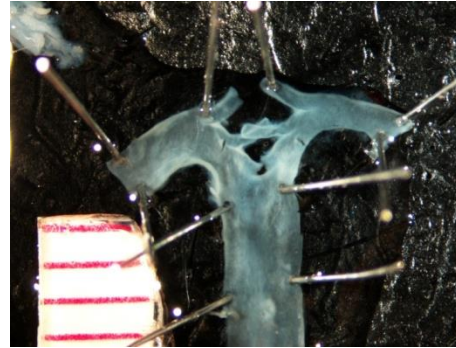

9.38 mm<sup>2</sup>

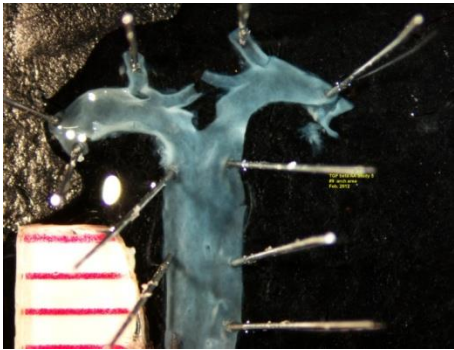

8.54 mm<sup>2</sup>

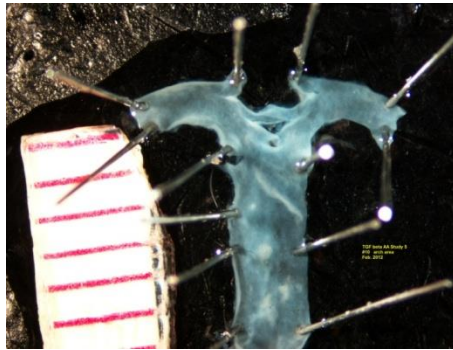

7.65 mm<sup>2</sup>

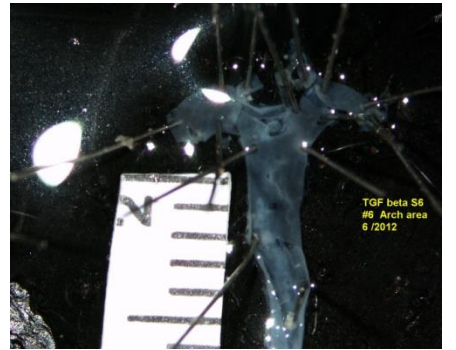

8.62 mm<sup>2</sup>

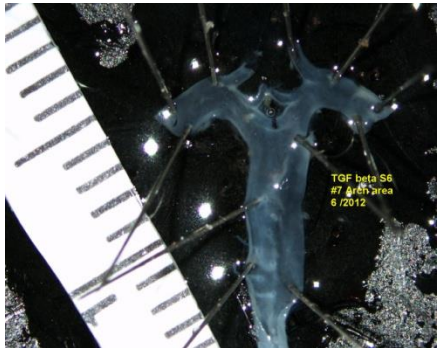

9.40 mm<sup>2</sup>

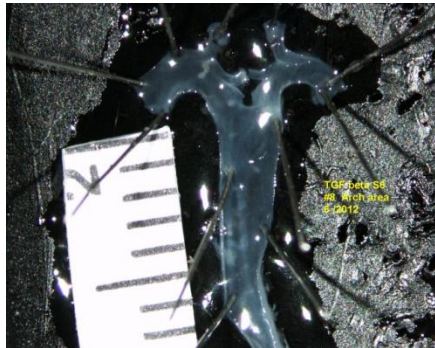

8.93 mm<sup>2</sup>

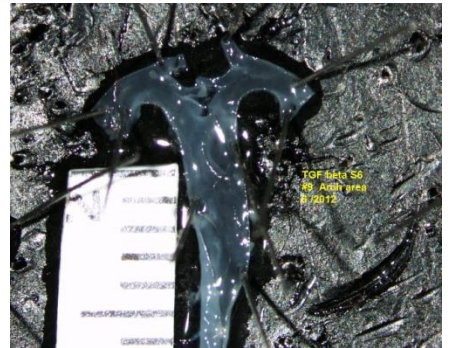

9.19 mm<sup>2</sup>

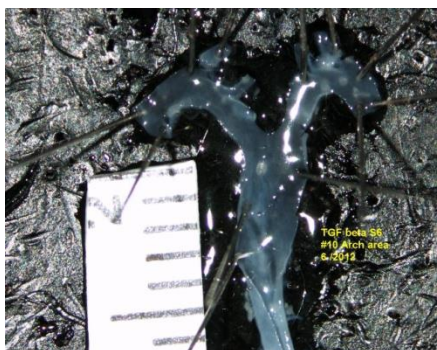

10.80 mm<sup>2</sup>

Study #2: Control, isotype-matched mouse IgG  
(5 mg/kg, 3 times/week)  
AngII-infused (1,000 ng/kg/min)

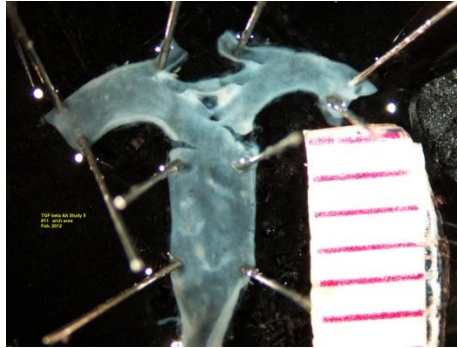

11.1 mm<sup>2</sup>

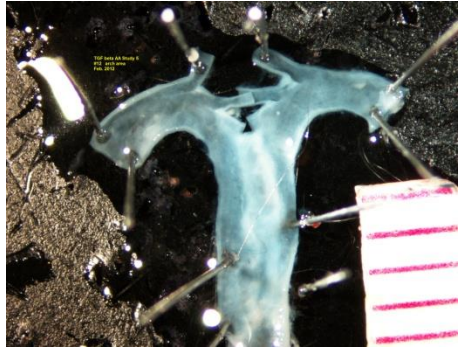

10.5 mm<sup>2</sup>

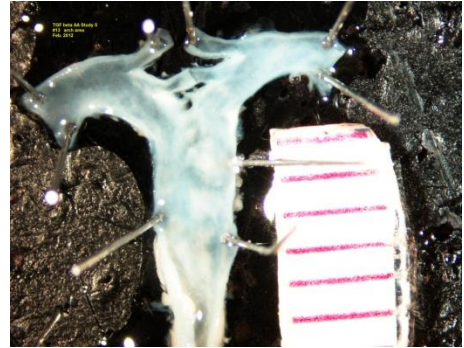

11.0 mm<sup>2</sup>

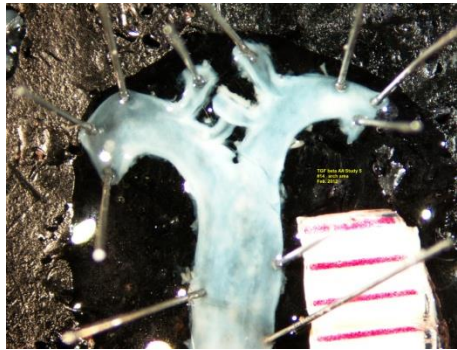

11.5 mm<sup>2</sup>

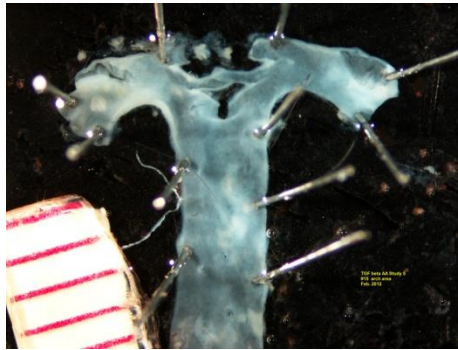

12.4 mm<sup>2</sup>

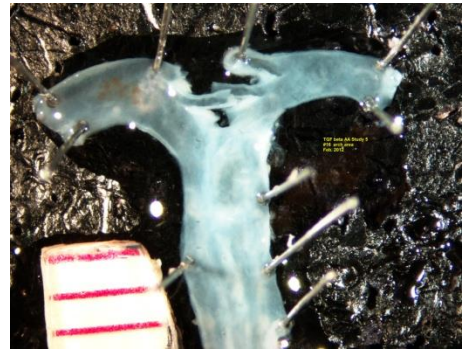

13.4 mm<sup>2</sup>

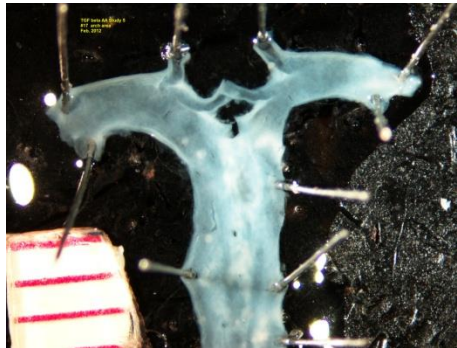

13.4 mm<sup>2</sup>

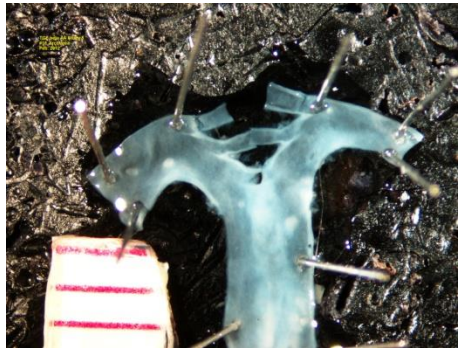

12.0 mm<sup>2</sup>

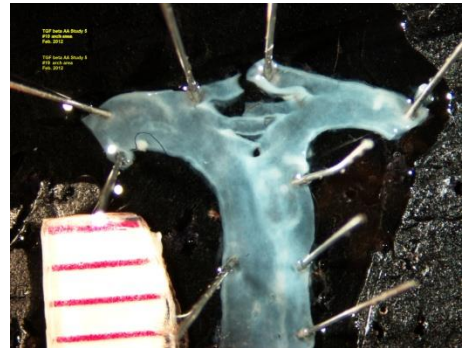

11.5 mm<sup>2</sup>

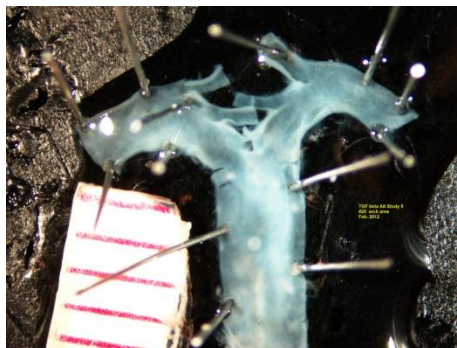

11.5 mm<sup>2</sup>

Study #2: Control, isotype-matched IgG  
(5 mg/kg, 3 times/week)  
AngII-infused (1,000 ng/kg/min)

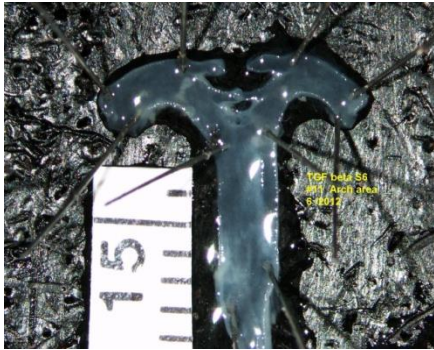

12.6 mm<sup>2</sup>

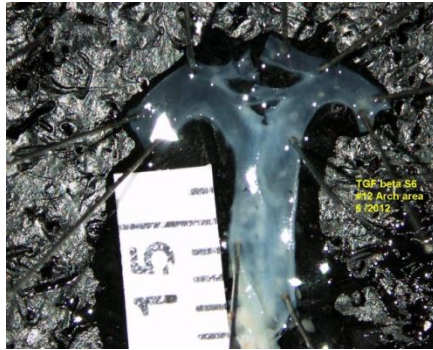

12.2 mm<sup>2</sup>

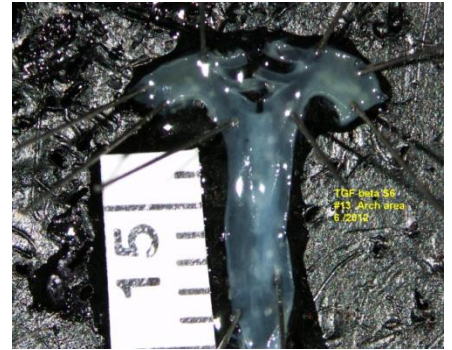

12.0 mm<sup>2</sup>

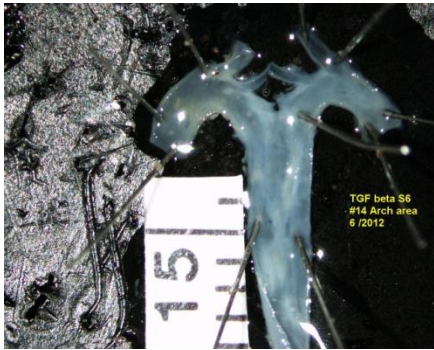

12.7 mm<sup>2</sup>

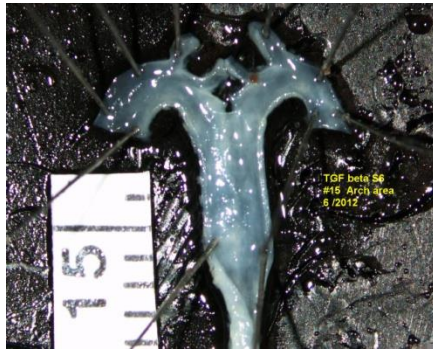

12.2 mm<sup>2</sup>

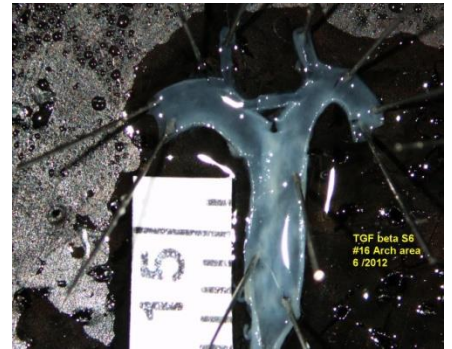

10.6 mm<sup>2</sup>

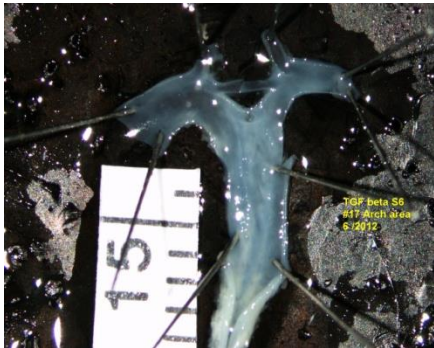

10.5 mm<sup>2</sup>

#18: Died

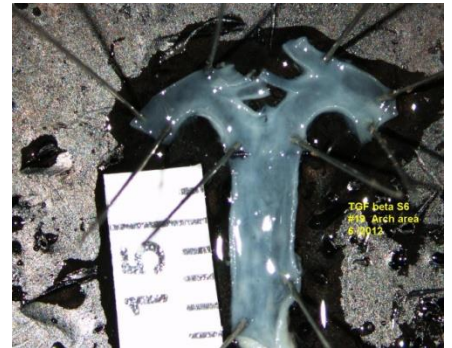

12.3 mm<sup>2</sup>

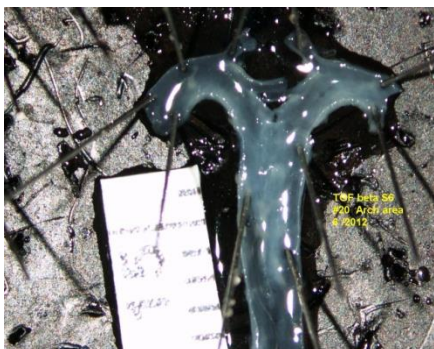

12.5 mm<sup>2</sup>

Study #2: TGF- $\beta$  mouse IgG  
(5 mg/kg, 3 times/week)  
AngII-infused (1,000 ng/kg/min)

#21a: Died

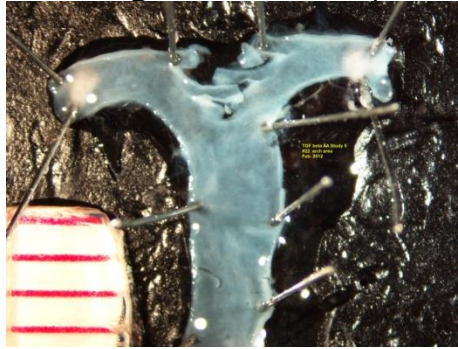

11.7 mm<sup>2</sup>

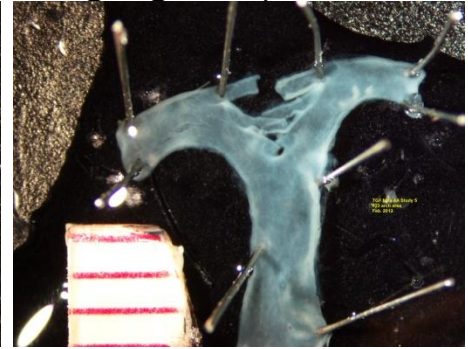

11.0 mm<sup>2</sup>

#24a: Died

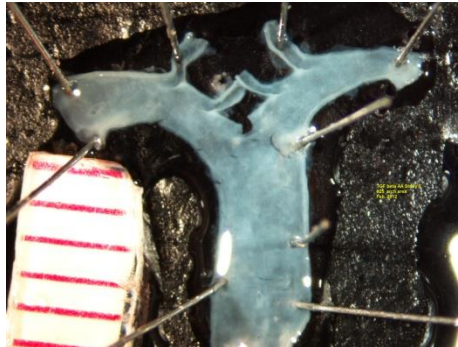

11.8 mm<sup>2</sup>

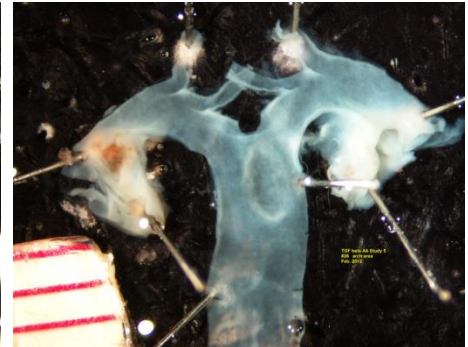

21.4 mm<sup>2</sup>

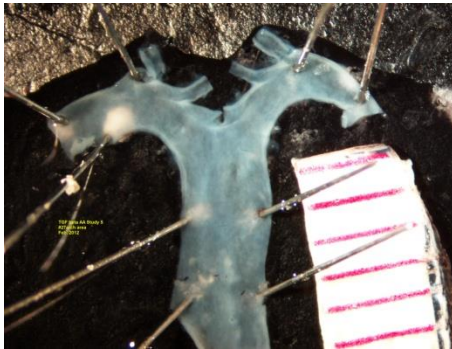

11.0 mm<sup>2</sup>

#28a: Died

#29a: Died

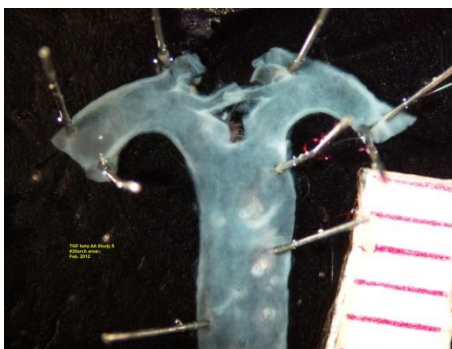

13.7 mm<sup>2</sup>

Study #2: TGF- $\beta$  mouse IgG  
(5 mg/kg, 3 times/week)  
AngII-infused (1,000 mg/kg/min)

#21b: Died

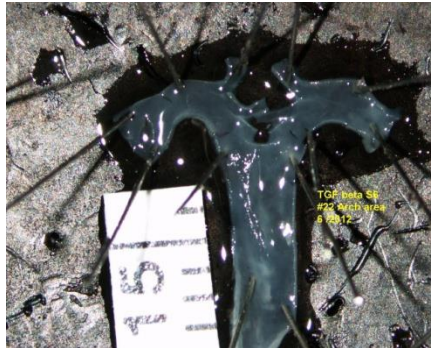

16.0 mm<sup>2</sup>

#23b: Died

#24b: Died

#25b: Died

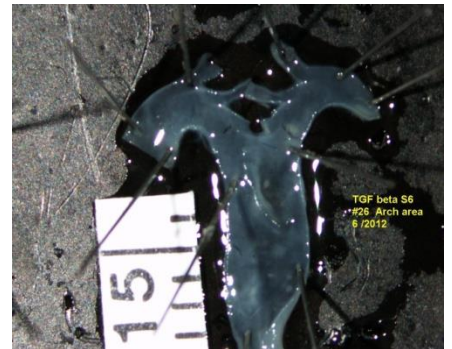

13.3 mm<sup>2</sup>

#27b: Died

#28b: Died

#29b: Died

#30b: Died
