# Supplementary material for: TGF-β Neutralization Enhances AngII-Induced Aortic Rupture and Aneurysm in Both Thoracic and Abdominal Regions
Source: PubMed Central journal article supplement (PMC4841552; doi:10.1371/journal.pone.0153811), 2016-04-22
Supplement: pone.0153811.s011.pdf [file pone.0153811.s011.pdf]

# Study #2: Control, isotype-matched mouse IgG (5 mg/kg, 3 times/week) Saline-infused

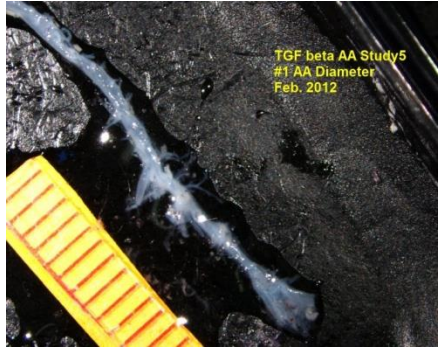

0.78 mm

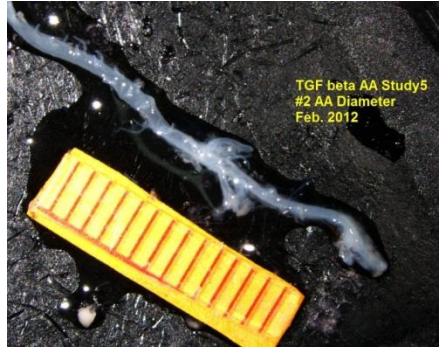

0.82 mm

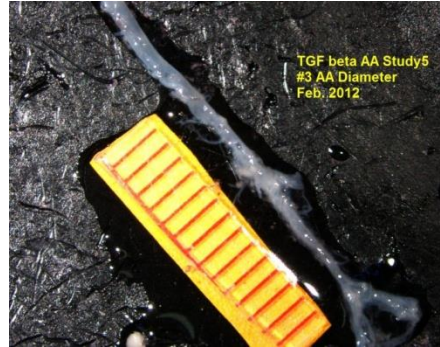

0.72 mm

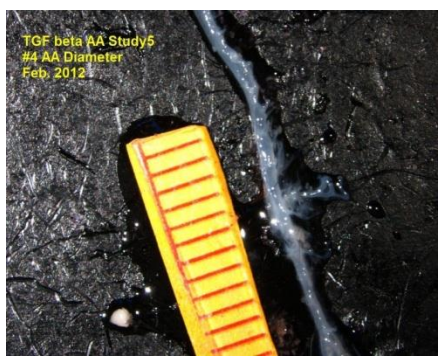

0.73 mm

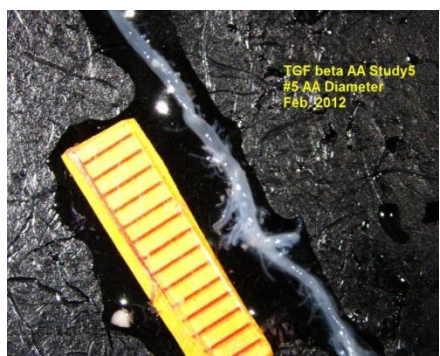

0.75 mm

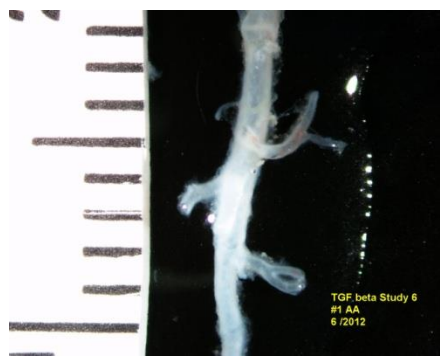

0.81 mm

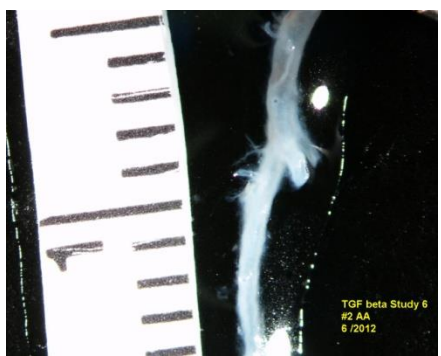

0.78 mm

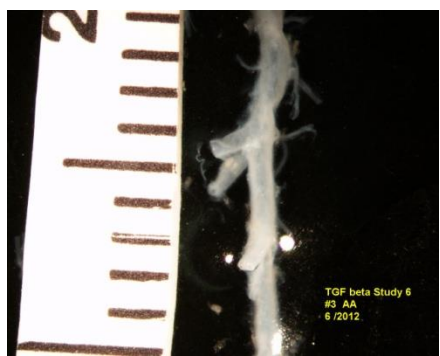

0.81 mm

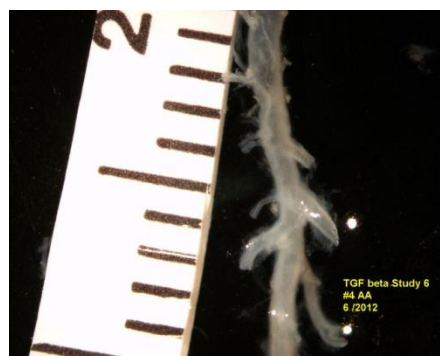

0.74 mm

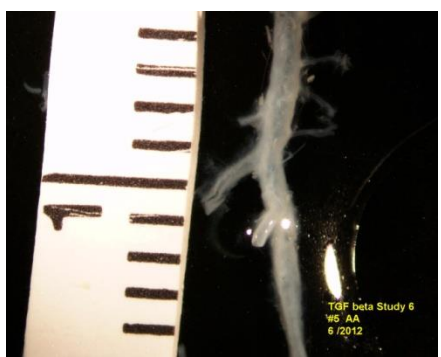

0.84 mm

Study #2: TGF- $\beta$  mouse IgG  
(5 mg/kg, 3 times/week)  
Saline-infused

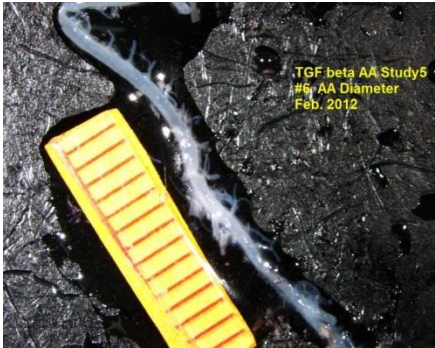

0.80 mm

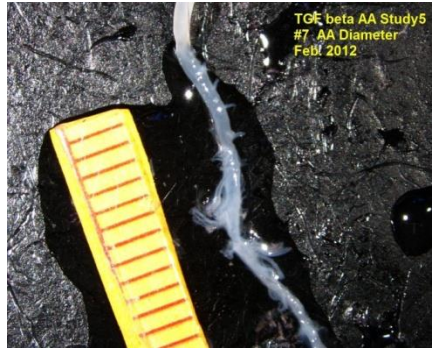

0.88 mm

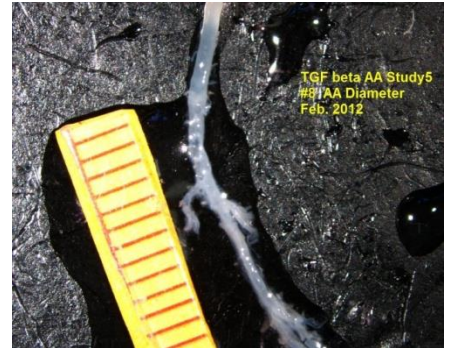

0.84 mm

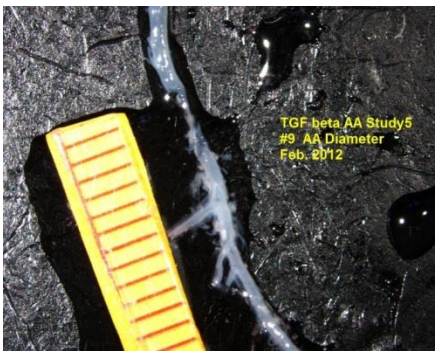

0.82 mm

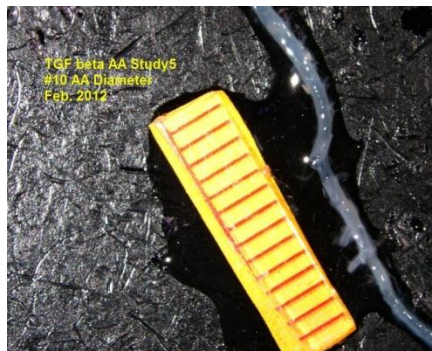

0.80 mm

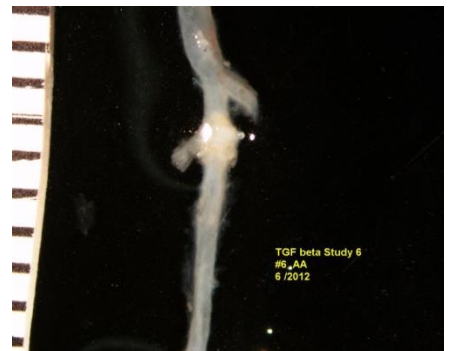

1.12 mm

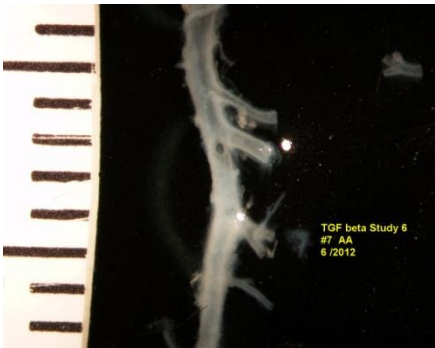

0.83 mm

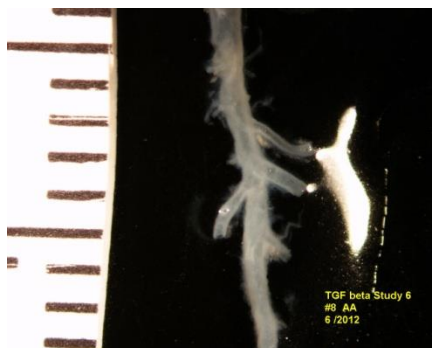

0.75 mm

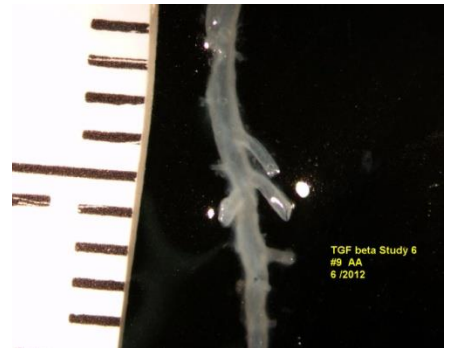

1.02 mm

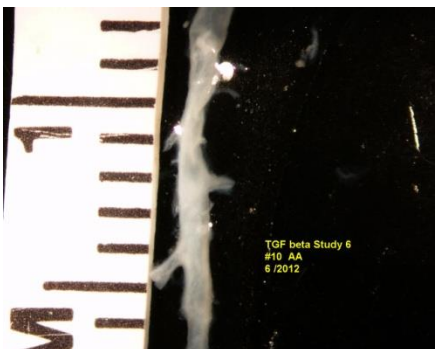

0.73 mm

Study #2: Control, isotype-matched mouse IgG  
(5 mg/kg; 3 times/week)  
AngII-infused (1,000 ng/kg/min

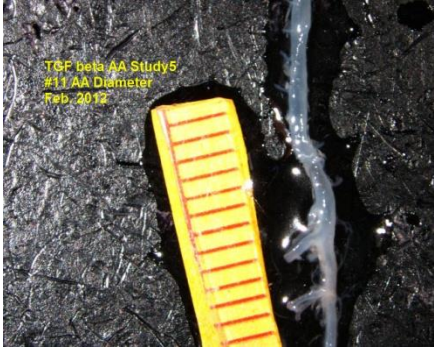

0.98 mm

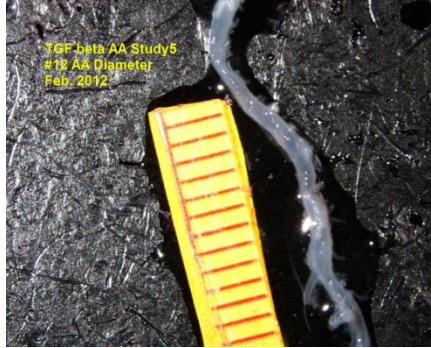

1.08 mm

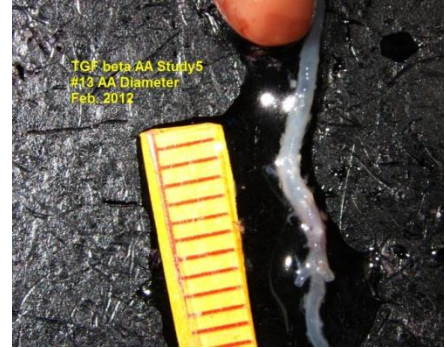

1.19 mm

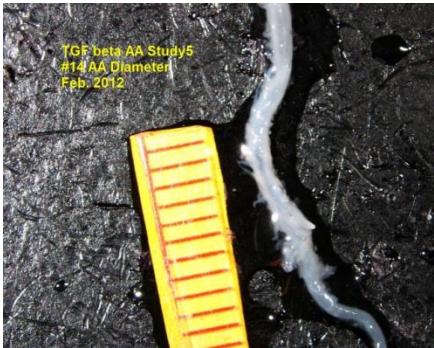

1.06 mm

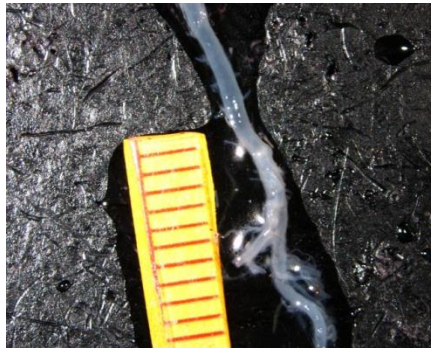

1.13 mm

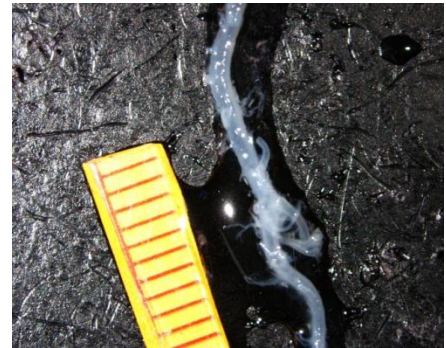

1.10 mm

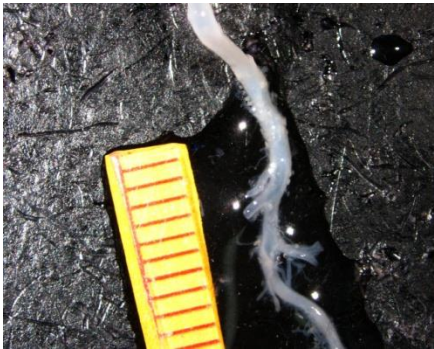

1.16 mm

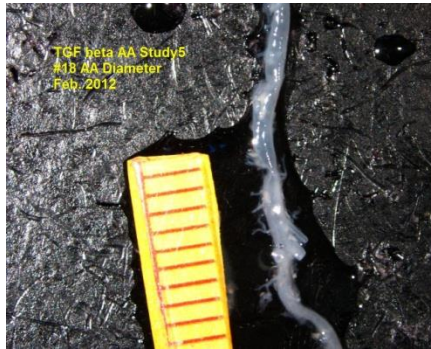

1.11 mm

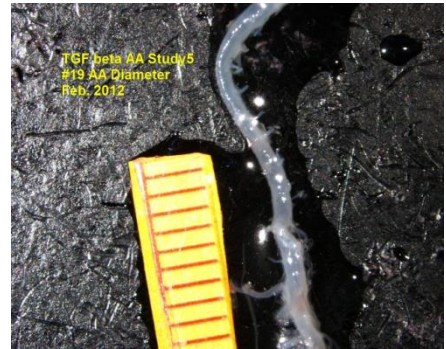

1.15 mm

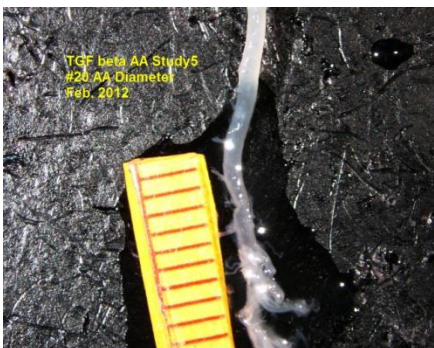

0.99 mm

Study #2: Control, isotype-matched IgG  
(5 mg/kg, 3 times/week)  
AngII (1,000 mg/kg/min)

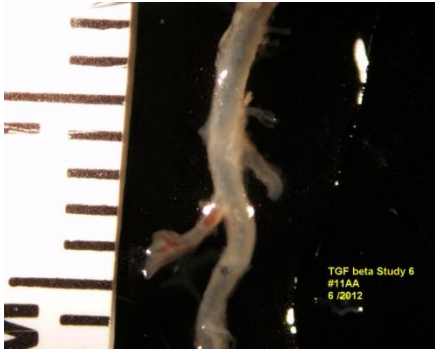

0.94 mm

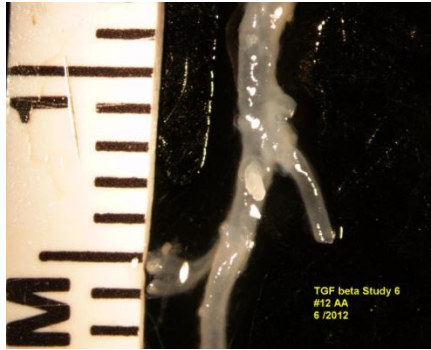

1.06 mm

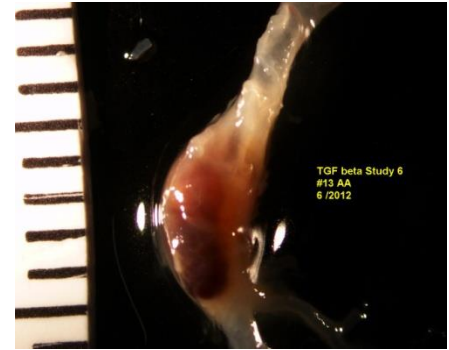

2.63 mm

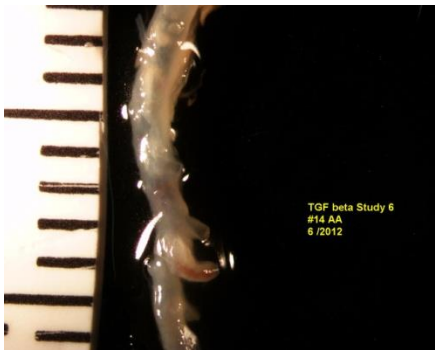

1.05 mm

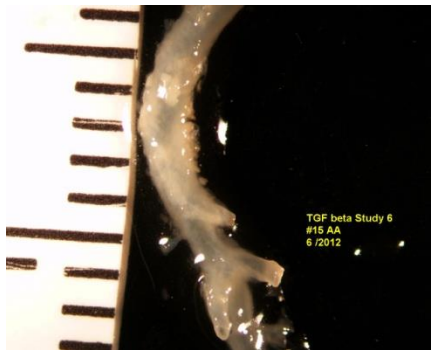

1.26 mm

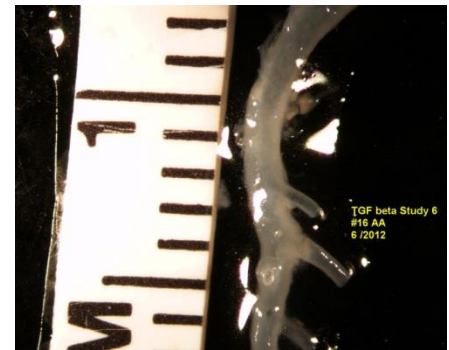

1.04 mm

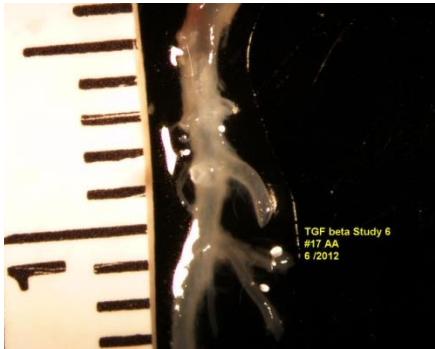

0.98 mm

#18: Died

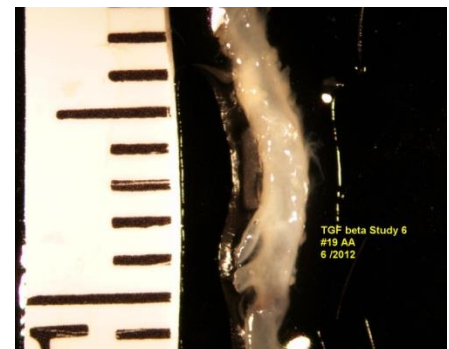

1.23 mm

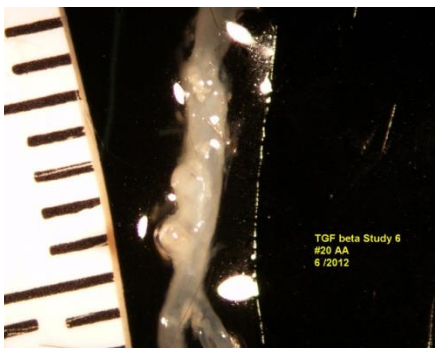

1.37 mm

Study #2: TGF- $\beta$  mouse IgG  
(5 mg/kg, 3 times/week)  
AngII-infused (1,000 ng/kg/min)

#21a: Died

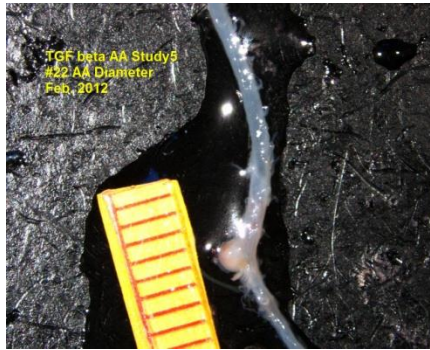

2.04 mm

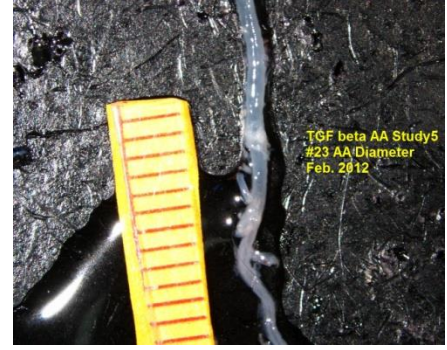

0.82 mm

#24a: Died

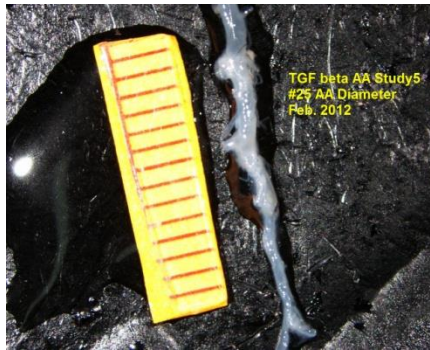

0.97 mm

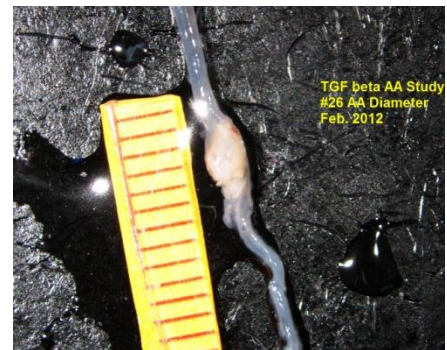

2.26 mm

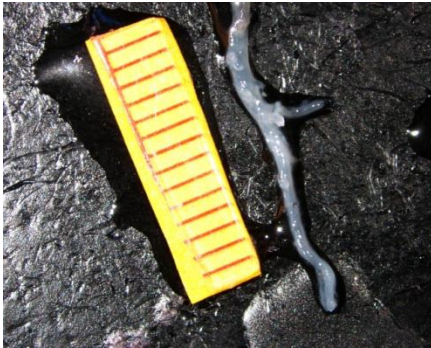

1.05 mm

#28a: Died

#29a: Died

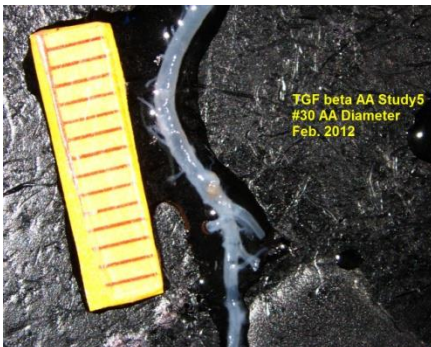

1.35 mm

Study #2: TGF- $\beta$  mouse IgG  
(5 mg/kg, 3 times/week)  
AngII –infused (1,000 ng/kg/min)

#21b: Died

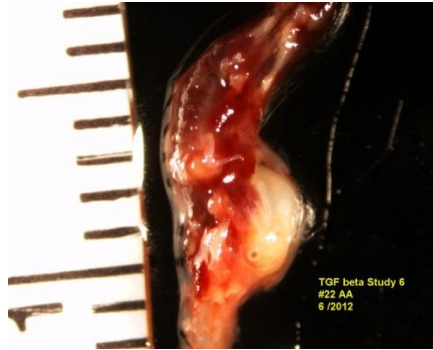

3.63 mm

#23b: Died

#24b: Died

#25b: Died

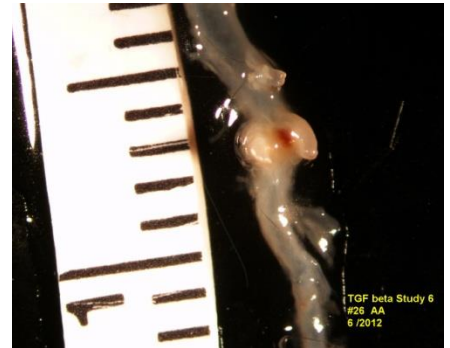

1.60 mm

#27b: Died

#28b: Died

#29b: Died

#30b: Died
