# Supplementary material for: TGF-β Neutralization Enhances AngII-Induced Aortic Rupture and Aneurysm in Both Thoracic and Abdominal Regions
Source: PubMed Central journal article supplement (PMC4841552; doi:10.1371/journal.pone.0153811), 2016-04-22
Supplement: pone.0153811.s013.pdf [file pone.0153811.s013.pdf]

Control, isotype-matched mouse IgG  
(5 mg/kg, 3 times/week)  
Saline-infused  
Day 0

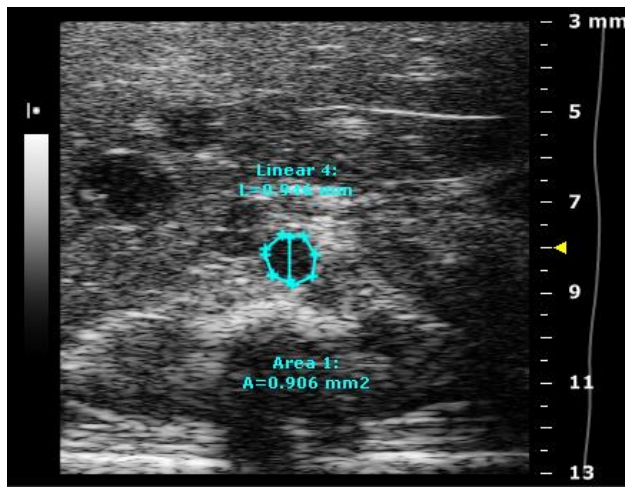

0.95 mm

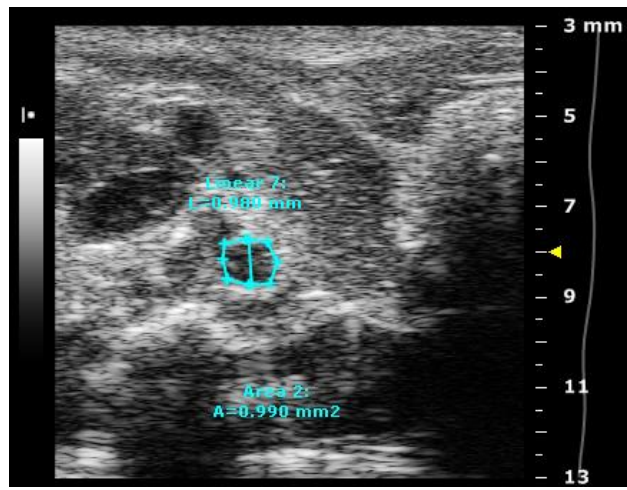

0.98 mm

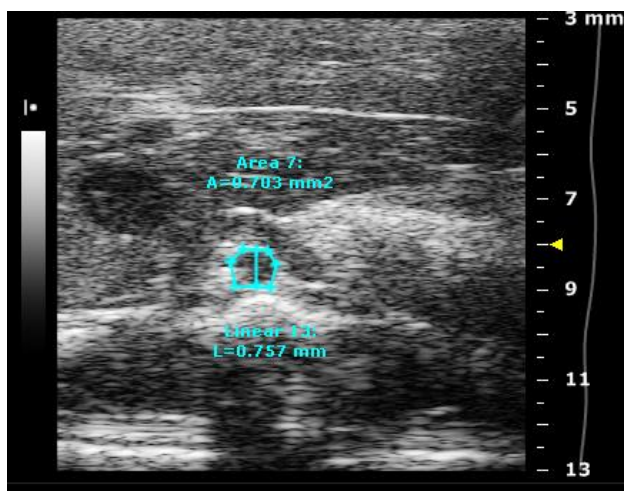

0.76 mm

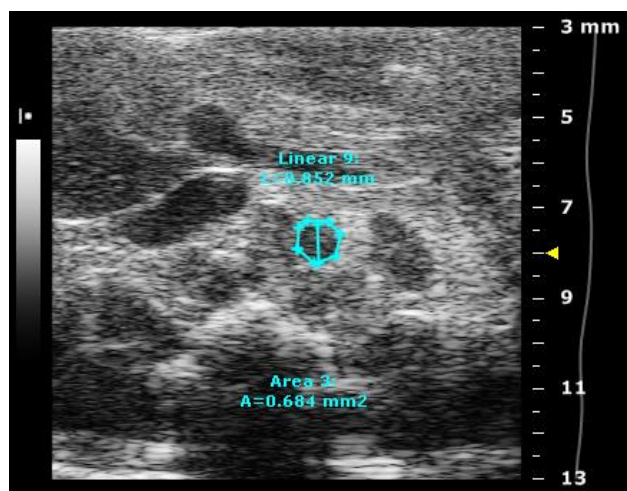

0.85 mm

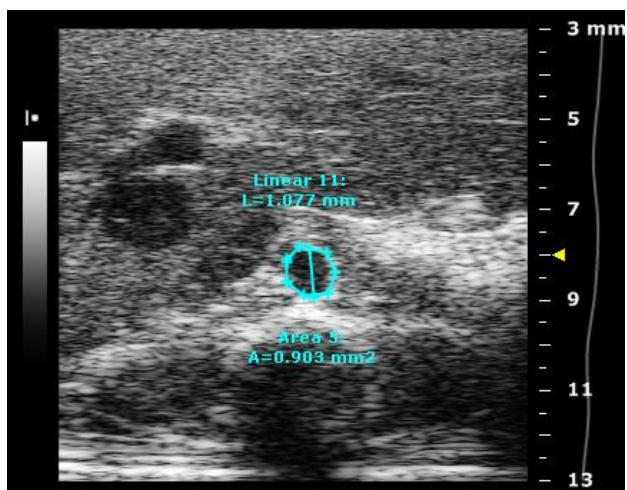

1.08 mm

TGF- $\beta$  mouse IgG  
(5 mg/kg, 3 times/week)  
Saline-infused  
Day 0

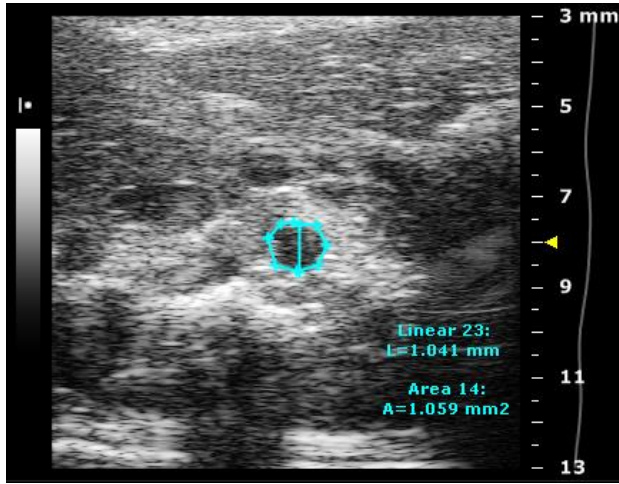

1.04 mm

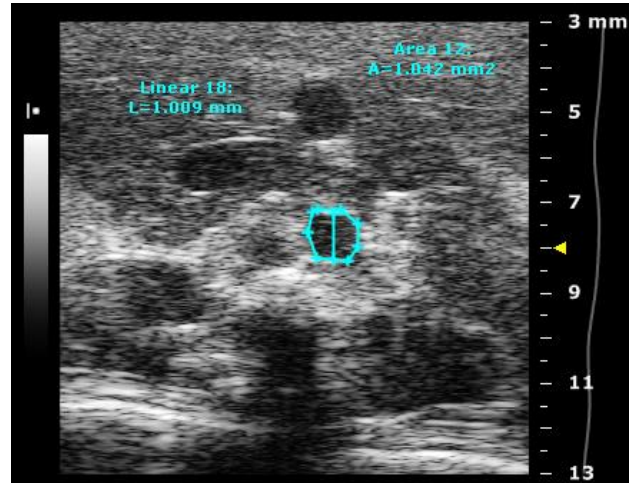

1.01 mm

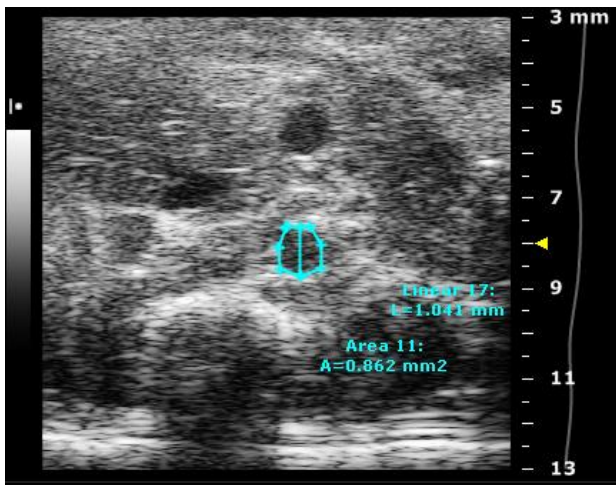

1.04 mm

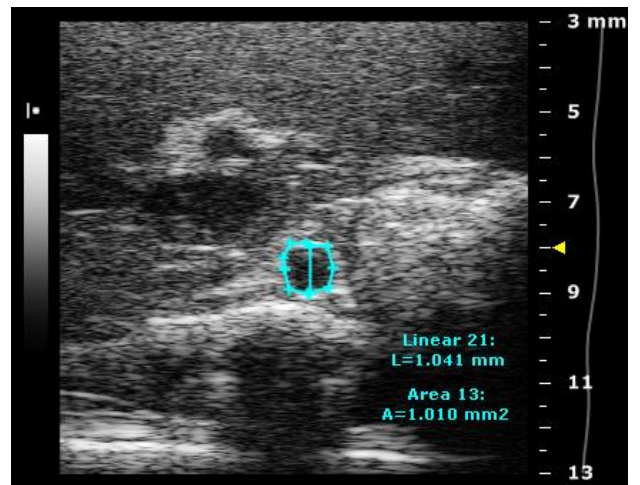

1.04 mm

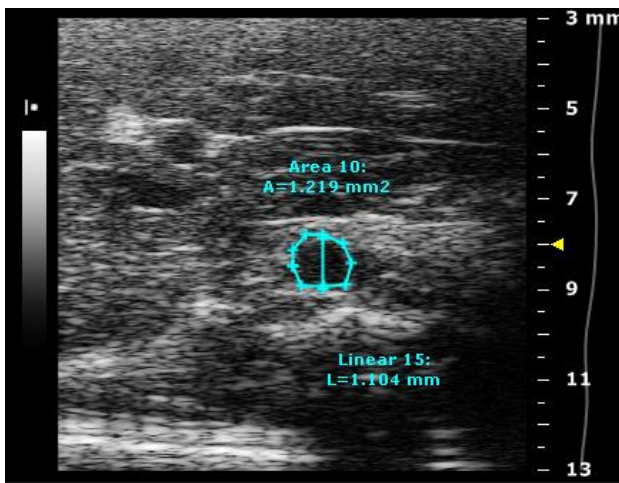

1.01 mm

Control, isotype-matched mouse IgG  
(5 mg/kg, 3 times/week)  
AngII-infused (1,000 ng/kg/min)  
Day 0

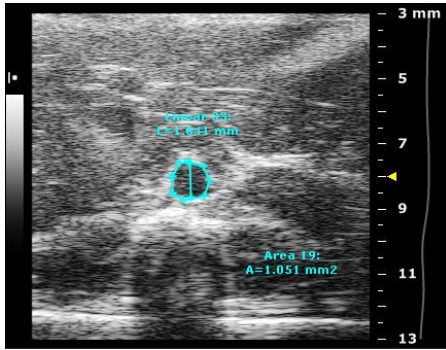

1.04 mm

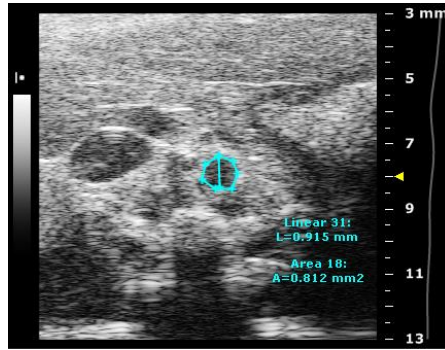

0.92 mm

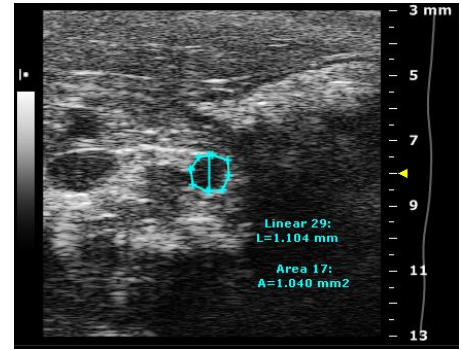

1.10 mm

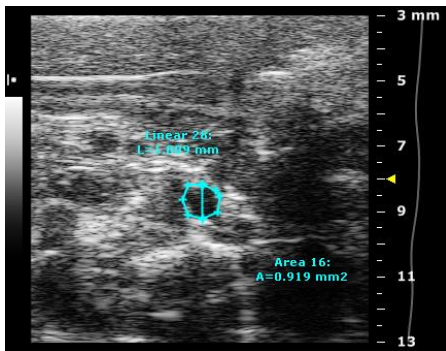

1.00 mm

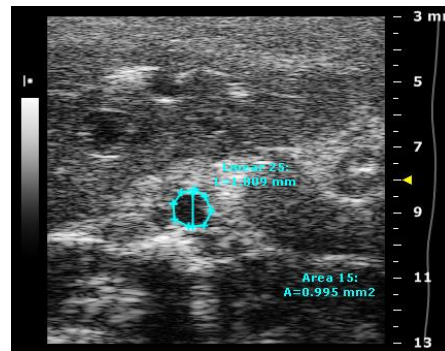

1.00 mm

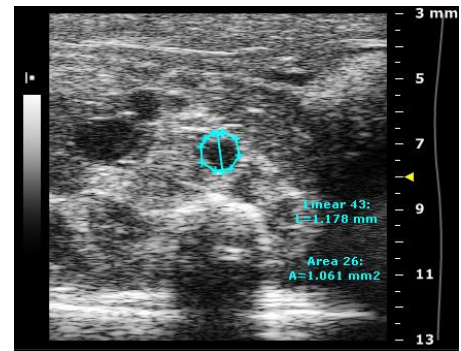

1.18 mm

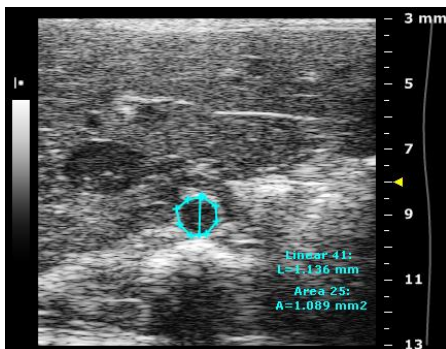

1.14 mm

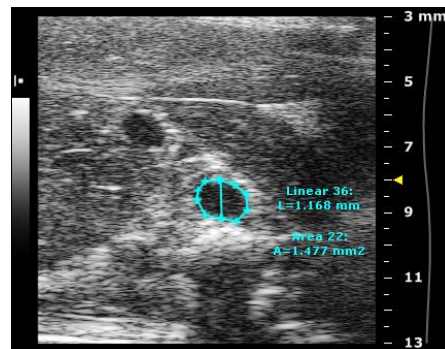

1.17 mm

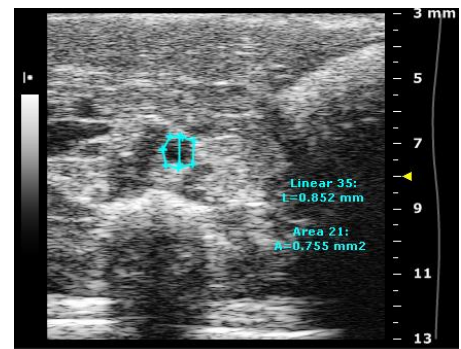

0.85 mm

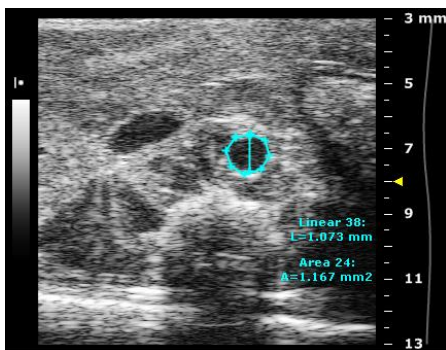

1.07 mm

TGF- $\beta$  mouse IgG  
(5 mg/kg, 3 times/week)  
AngII-infused (1,000 ng/kg/min)  
Day 0

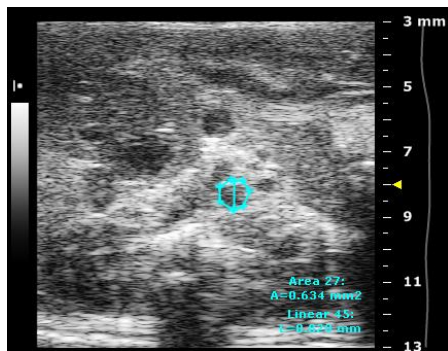

0.82 mm

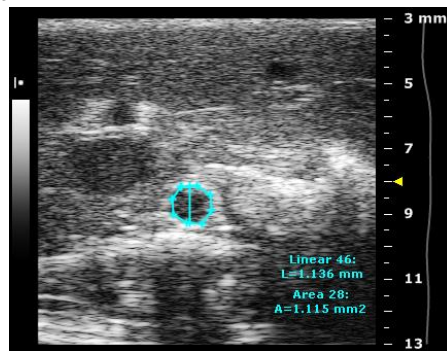

1.14 mm

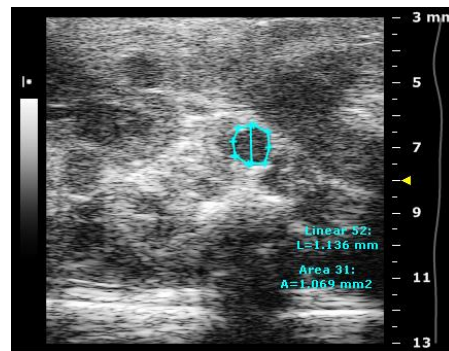

1.14 mm

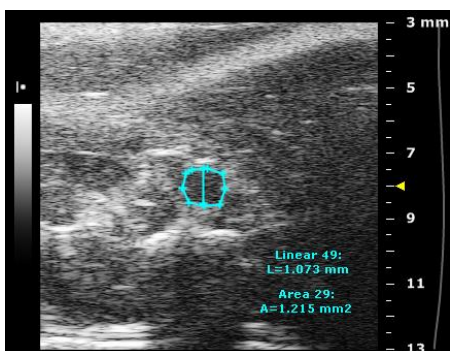

1.07 mm

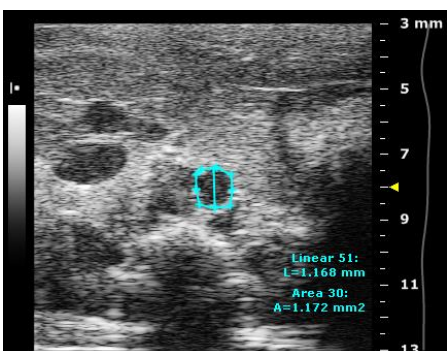

1.17 mm

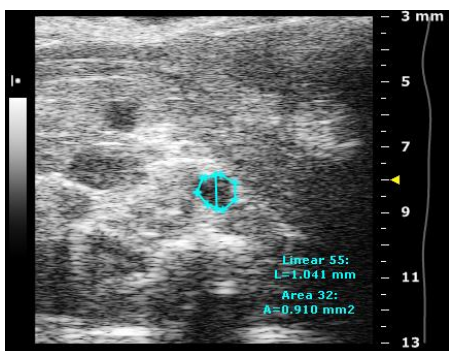

1.04 mm

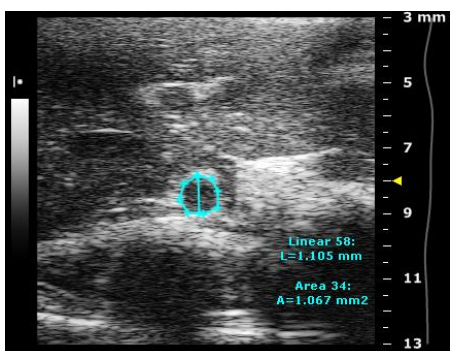

1.12 mm

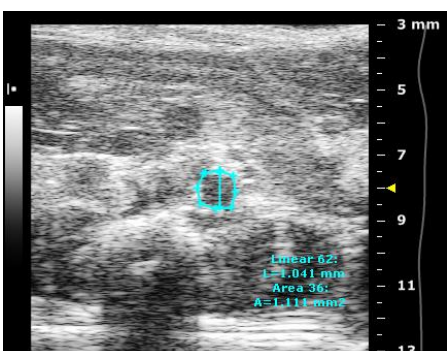

1.04 mm

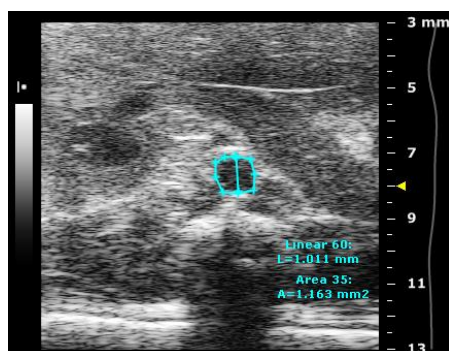

1.00 mm

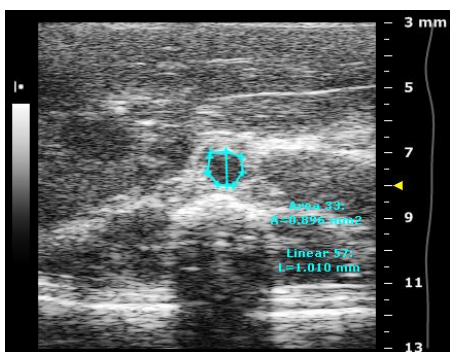

1.01 mm

Control, isotype-matched mouse IgG  
(5 mg/kg, 3 times/week)  
Saline-infused  
Day 4

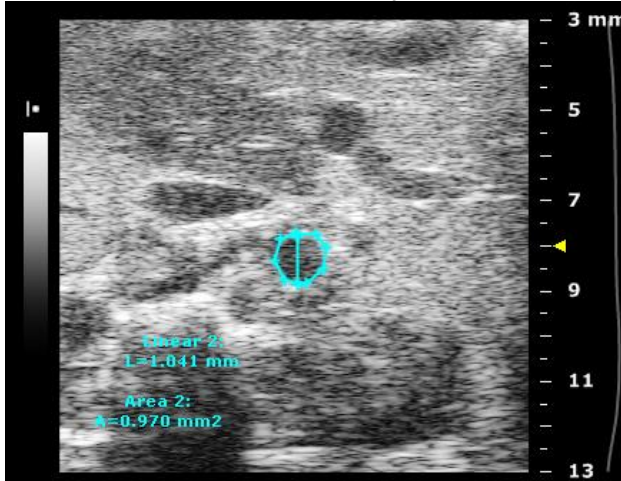

1.04 mm

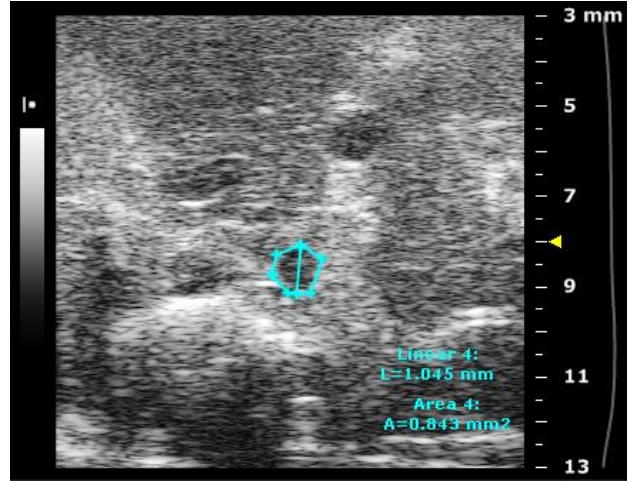

1.05 mm

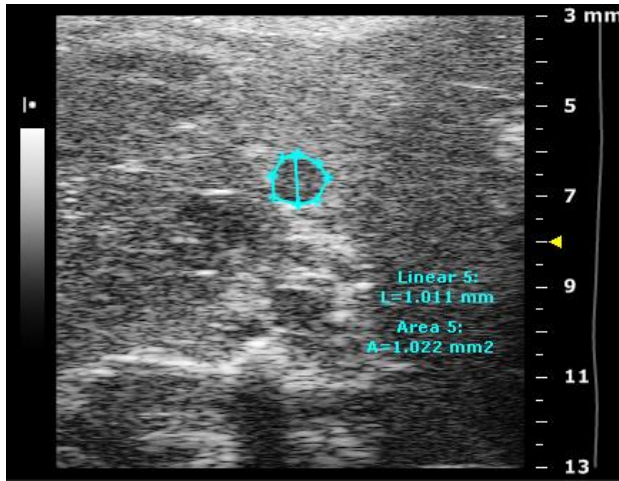

1.01 mm

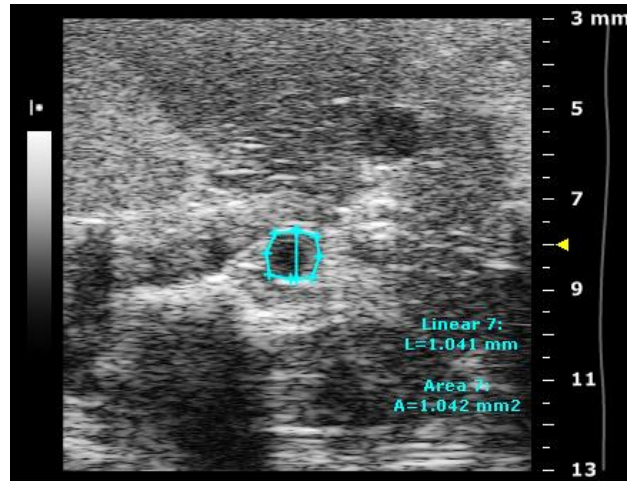

1.04 mm

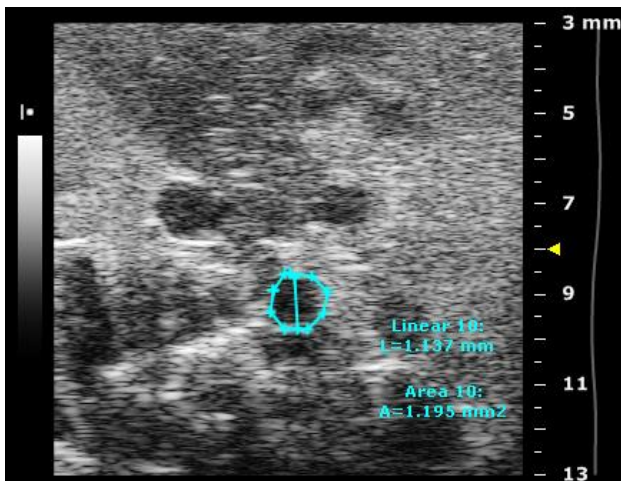

1.14 mm

TGF- $\beta$  mouse IgG  
(5 mg/kg, 3 times/week)  
Saline-infused  
Day 4

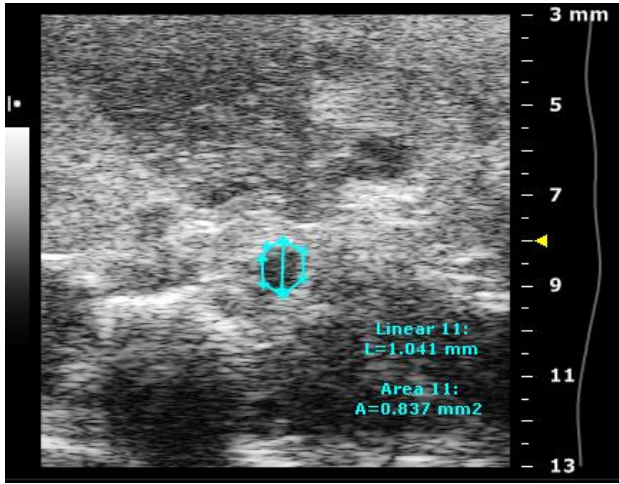

1.04 mm

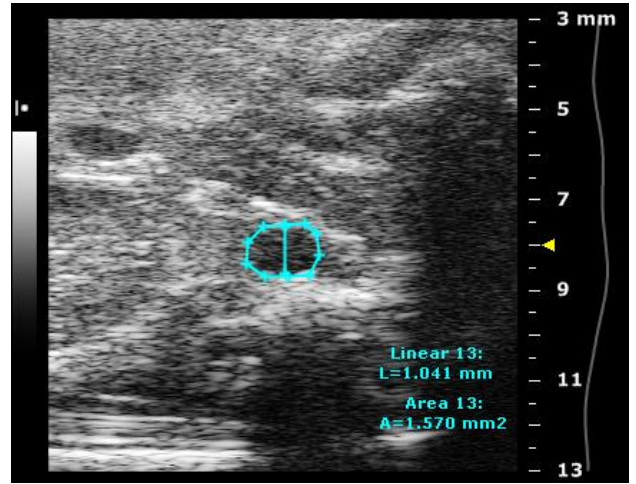

1.57 mm

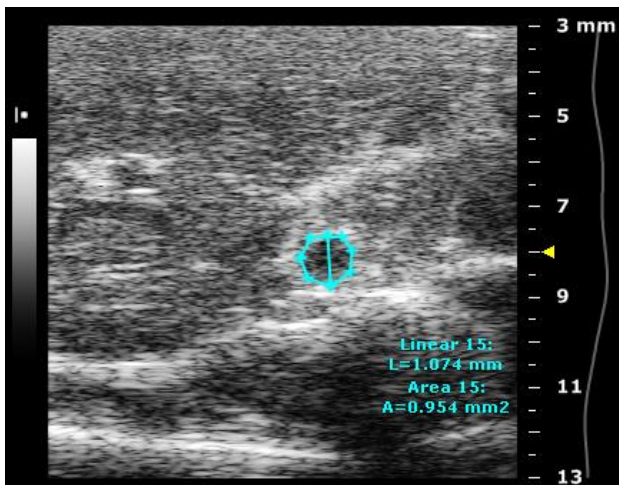

1.07 mm

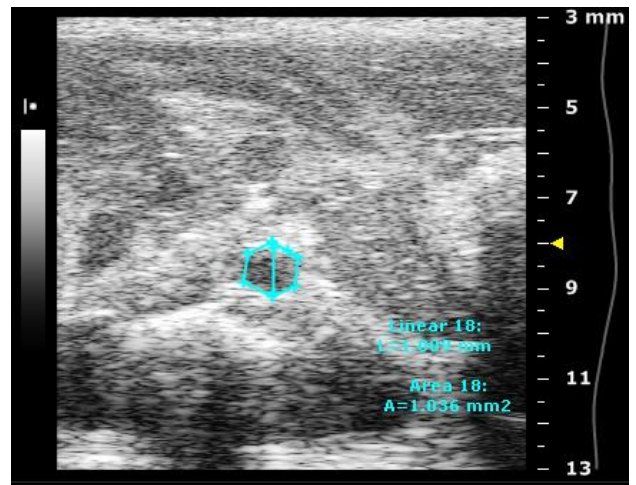

1.00 mm

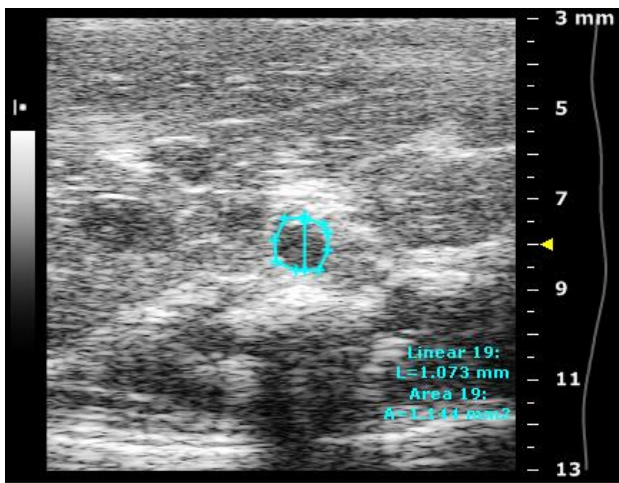

1.07 mm

Control, isotype-matched mouse IgG  
(5 mg/kg, 3 times/week)  
AngII-infused (1,000 ng/kg/min)  
Day 4

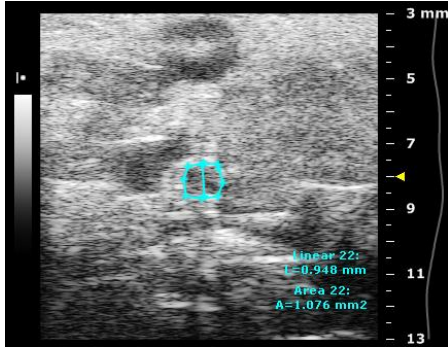

0.95 mm

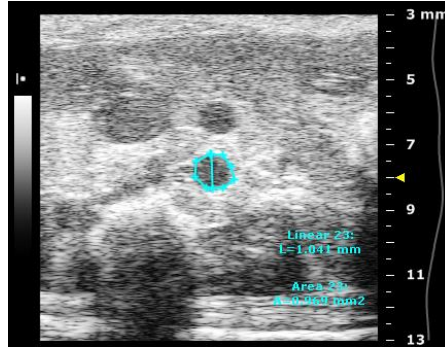

1.04 mm

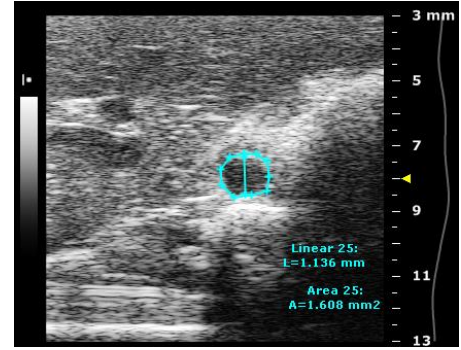

1.14 mm

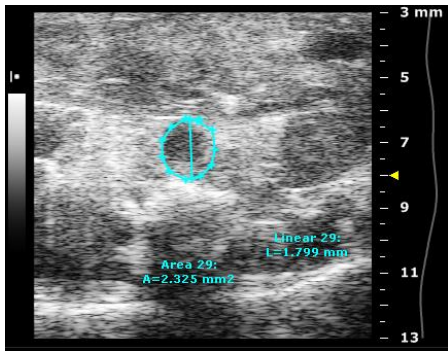

1.80 mm

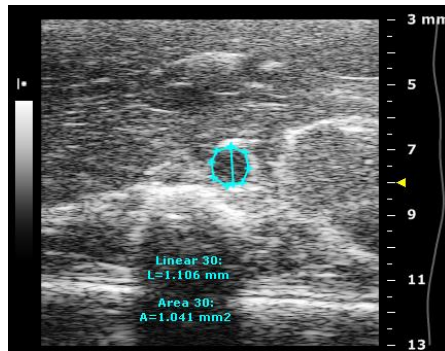

1.10 mm

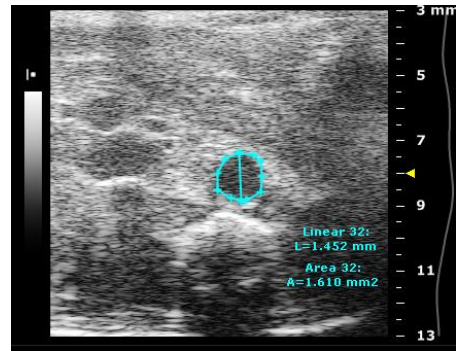

1.45 mm

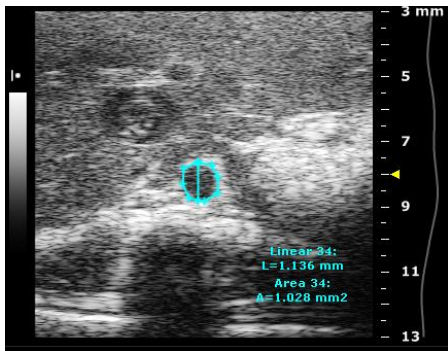

1.13 mm

#18: Died

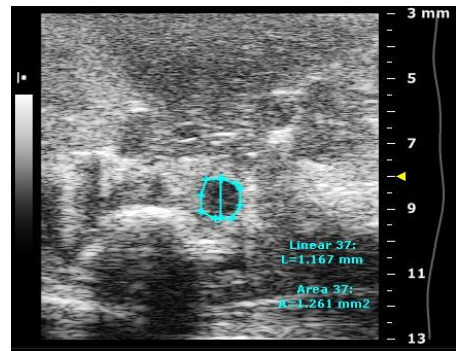

1.17 mm

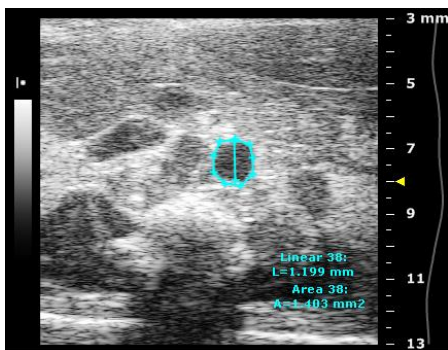

1.20 mm

TGF- $\beta$  mouse IgG  
 (5 mg/kg, 3 times/week)  
 AngII-infused  
 Day 4

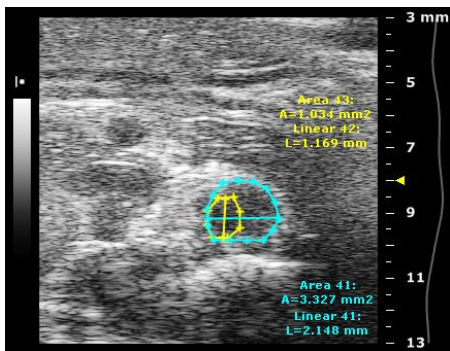

2.15 mm

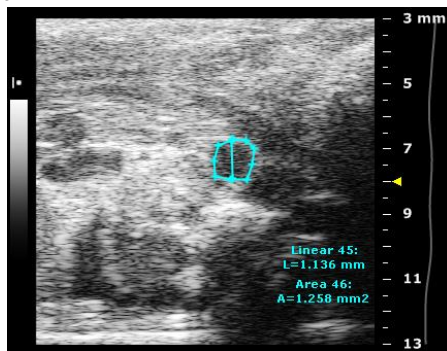

1.14 mm

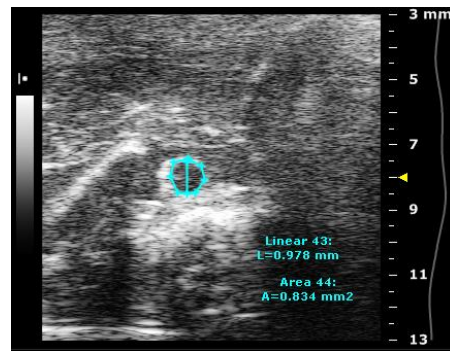

0.98 mm

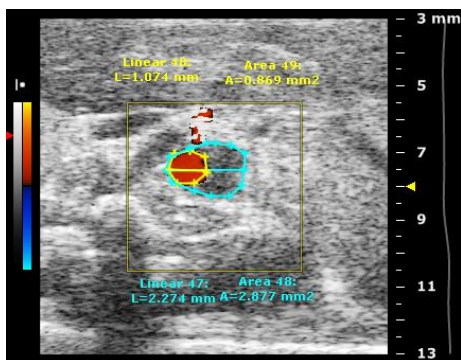

2.27 mm

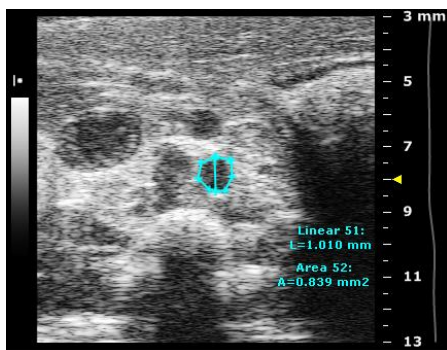

1.01 mm

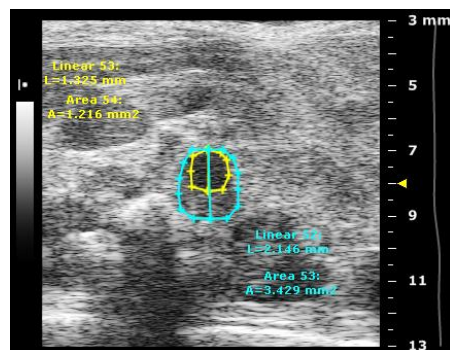

2.15 mm

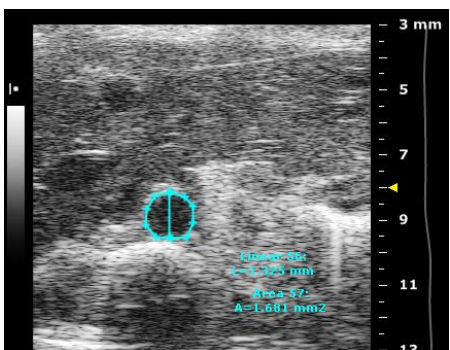

1.32 mm

#28: Died

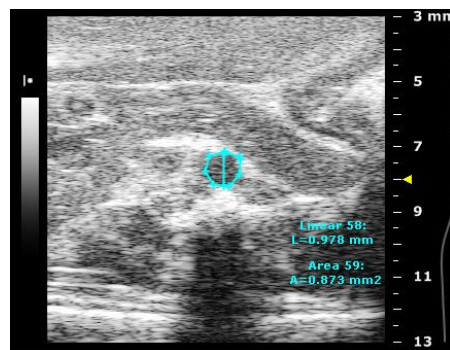

0.98 mm

#30: Died
