# Supplementary material for: TGF-β Neutralization Enhances AngII-Induced Aortic Rupture and Aneurysm in Both Thoracic and Abdominal Regions
Source: PubMed Central journal article supplement (PMC4841552; doi:10.1371/journal.pone.0153811), 2016-04-22
Supplement: pone.0153811.s014.pdf [file pone.0153811.s014.pdf]

Study #3: Control, isotype-matched IgG  
(0.3 mg/kg, 3 times/week)  
AngII-infused (1,000 ng/kg/min)

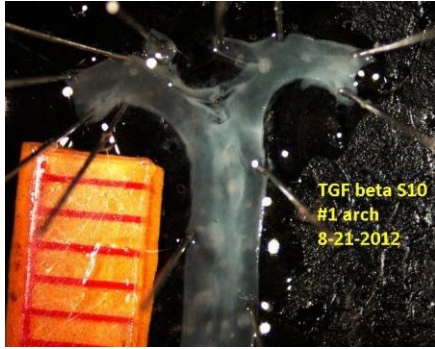

11.6 mm<sup>2</sup>

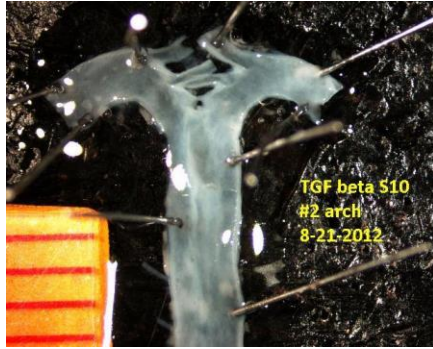

10.8 mm<sup>2</sup>

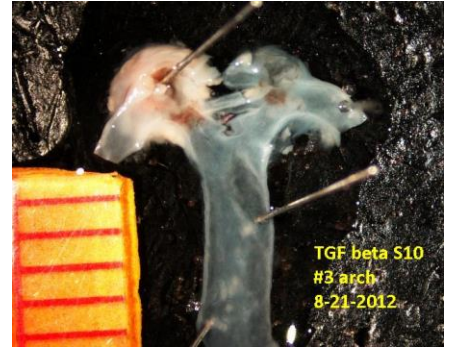

15.5 mm<sup>2</sup>

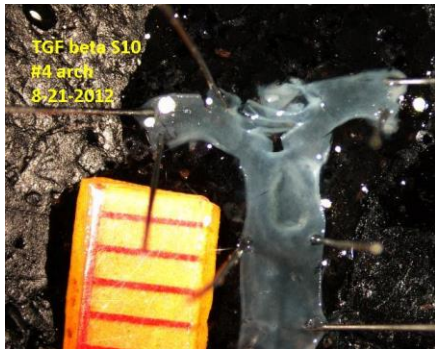

10.1 mm<sup>2</sup>

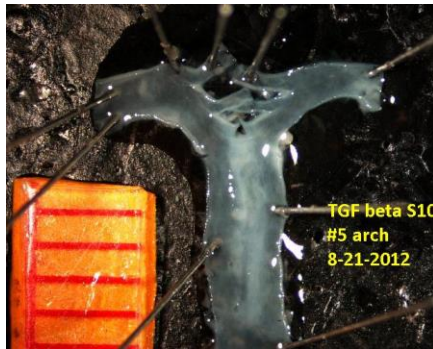

10.3 mm<sup>2</sup>

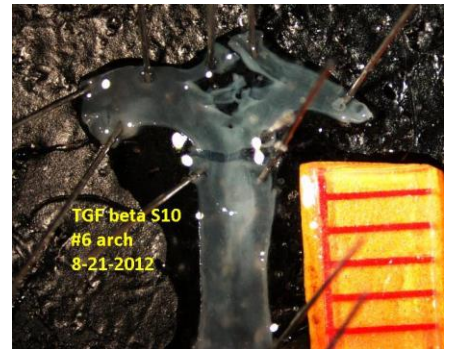

11.3 mm<sup>2</sup>

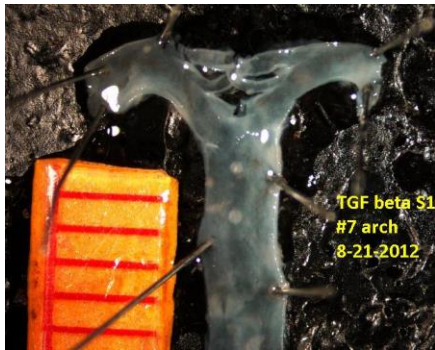

11.0 mm<sup>2</sup>

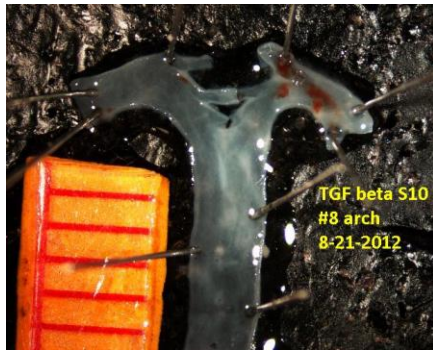

11.5 mm<sup>2</sup>

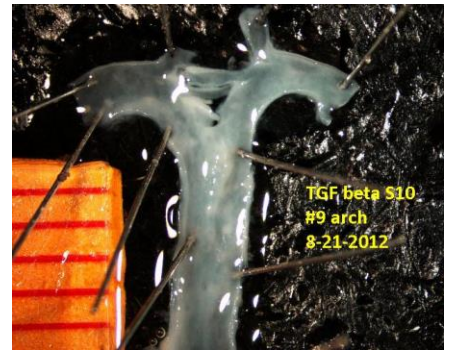

11.4 mm<sup>2</sup>

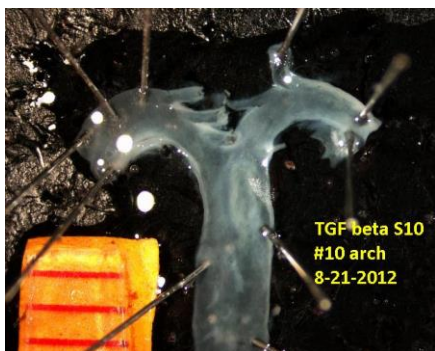

12.2 mm<sup>2</sup>

Study #3: TGF- $\beta$  mouse IgG  
(0.3 mg/kg, 3 times/week)  
AngII-infused (1,000 ng/kg/min)

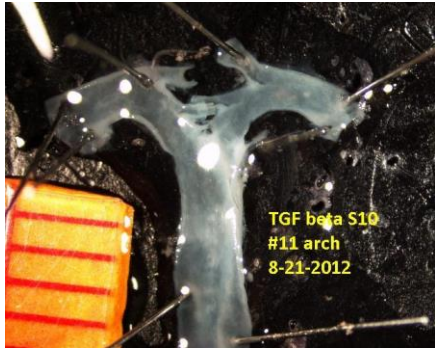

11.6 mm<sup>2</sup>

#12: Died

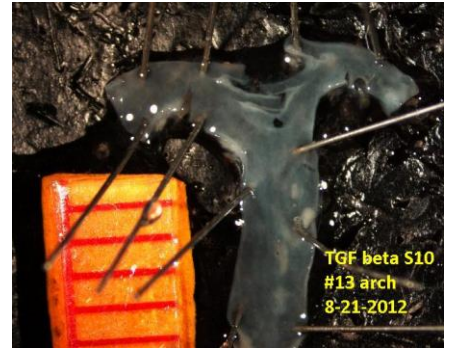

12.1 mm<sup>2</sup>

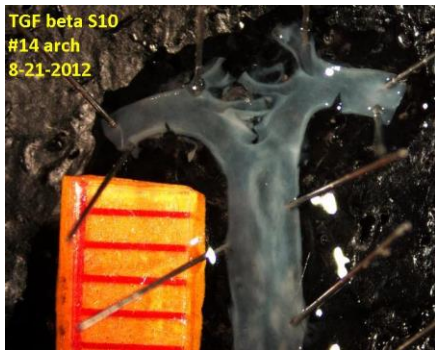

11.2 mm<sup>2</sup>

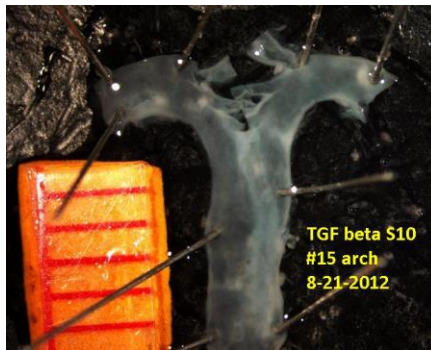

12.0 mm<sup>2</sup>

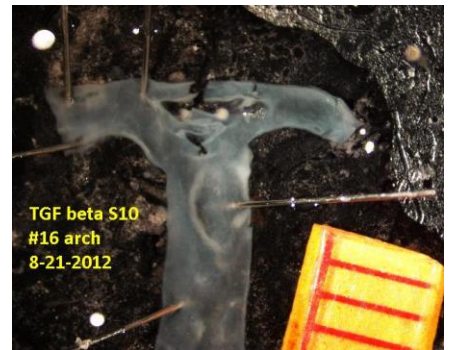

11.8 mm<sup>2</sup>

#17: Died

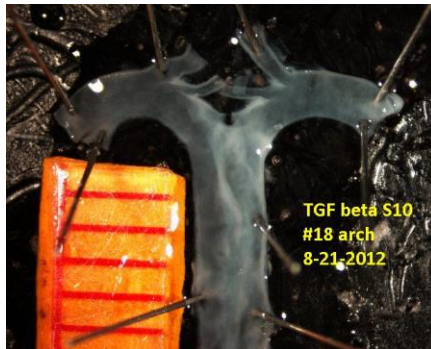

13.1 mm<sup>2</sup>

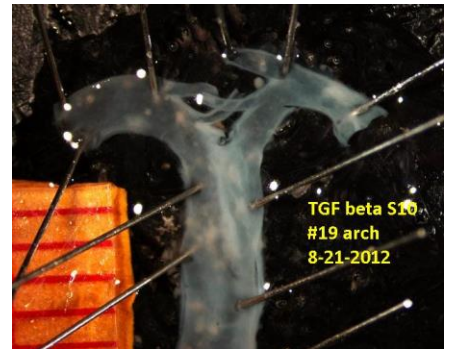

12.5 mm<sup>2</sup>

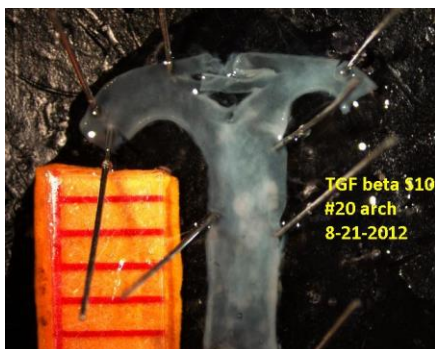

10.9 mm<sup>2</sup>

Study #3: Control, isotype-matched IgG  
(5 mg/kg, 3 times/week)  
AngII-infused (1,000 ng/kg/min)

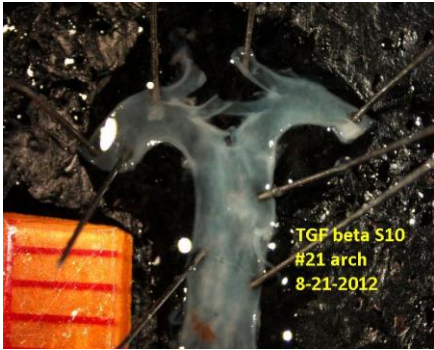

10.3 mm<sup>2</sup>

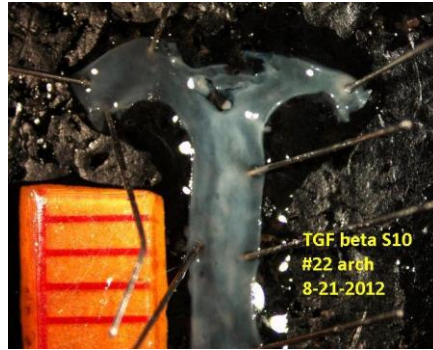

11.2 mm<sup>2</sup>

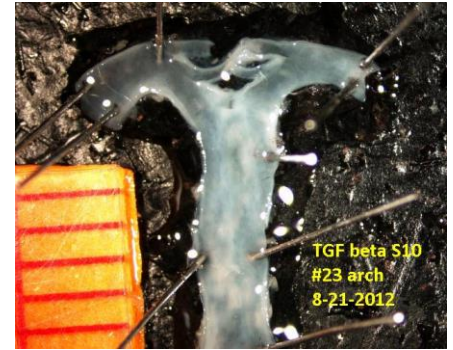

10.9 mm<sup>2</sup>

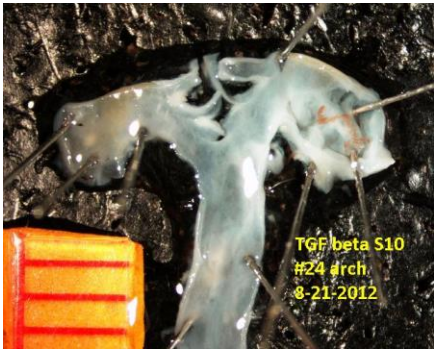

22.0 mm<sup>2</sup>

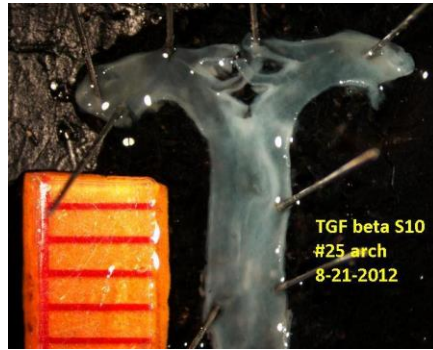

13.7 mm<sup>2</sup>

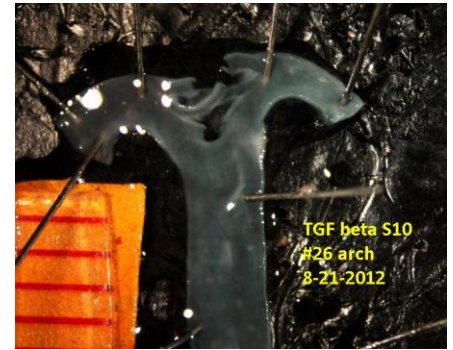

11.8 mm<sup>2</sup>

#27: Died

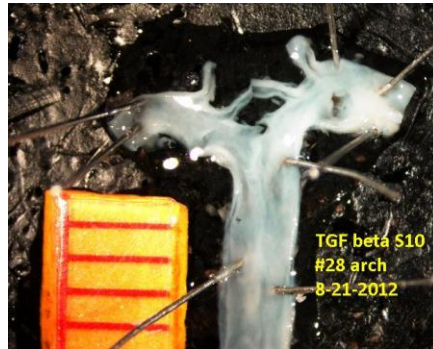

12.4 mm<sup>2</sup>

#29: Died

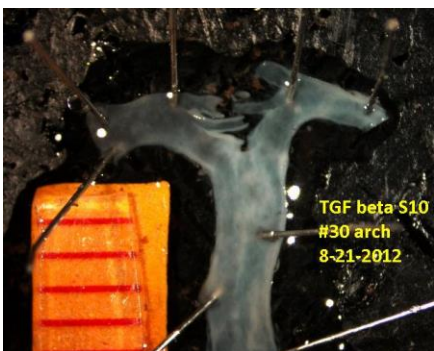

10.3 mm<sup>2</sup>

Study #3: TGF- $\beta$  mouse IgG  
(3 mg/kg, 3 times/week)  
AngII-infused (1,000 ng/kg/min)

#31: Died

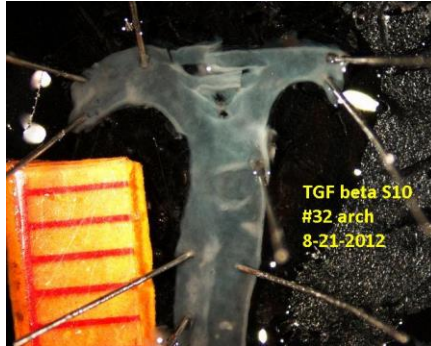

#33: Died

10.5 mm<sup>2</sup>

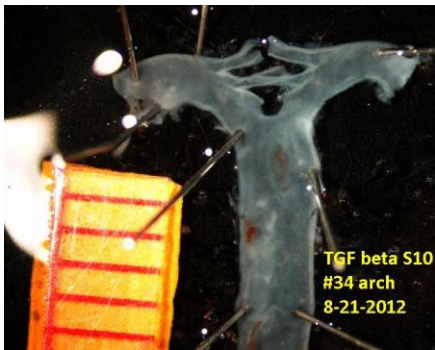

#35:  
Not  
Available

#36: Died

10.8 mm<sup>2</sup>

10.9 mm<sup>2</sup>

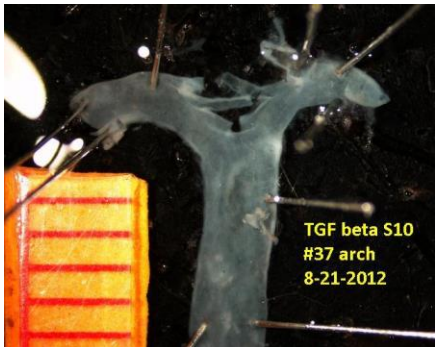

#39: Died

10.6 mm<sup>2</sup>

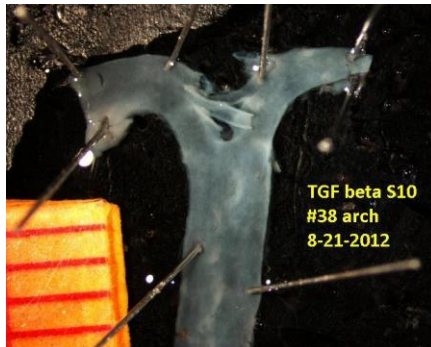

12.8 mm<sup>2</sup>

#40: Died
