# Supplementary material for: TGF-β Neutralization Enhances AngII-Induced Aortic Rupture and Aneurysm in Both Thoracic and Abdominal Regions
Source: PubMed Central journal article supplement (PMC4841552; doi:10.1371/journal.pone.0153811), 2016-04-22
Supplement: pone.0153811.s016.pdf [file pone.0153811.s016.pdf]

# Study #4: Control, isotype-matched IgG AngII-infusion (1,000 mg/kg/min)

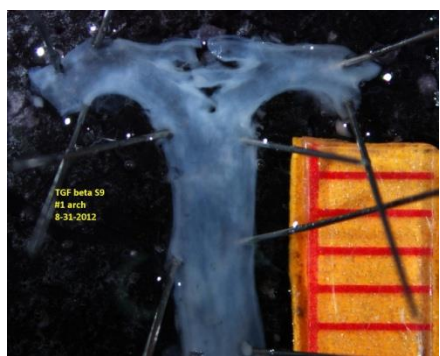

10.7 mm<sup>2</sup>

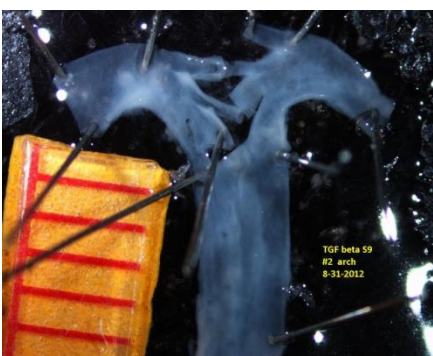

13.0 mm<sup>2</sup>

#3:  
Not  
Available

12.3 mm<sup>2</sup>

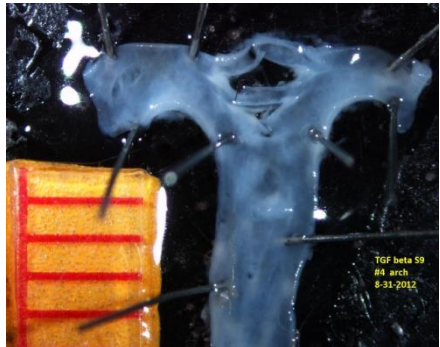

14.3 mm<sup>2</sup>

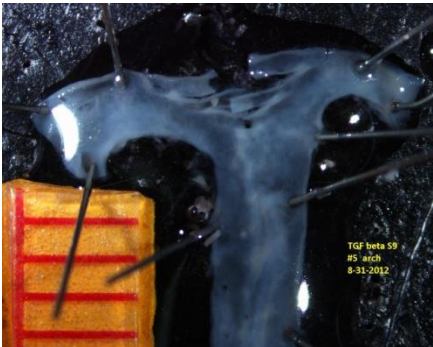

13.9 mm<sup>2</sup>

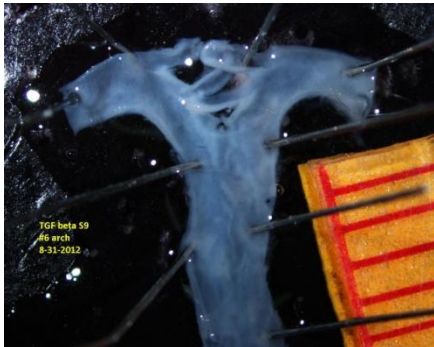

11.1 mm<sup>2</sup>

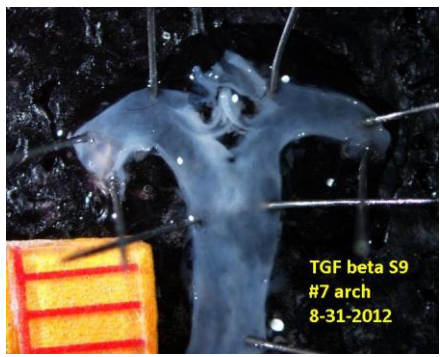

11.2 mm<sup>2</sup>

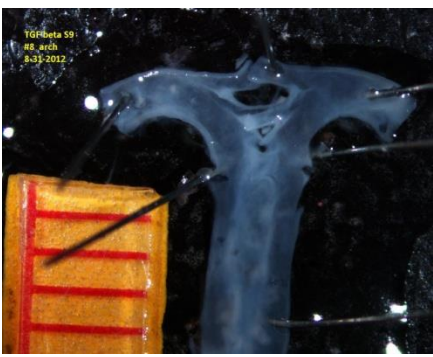

10.1 mm<sup>2</sup>

#9: Died

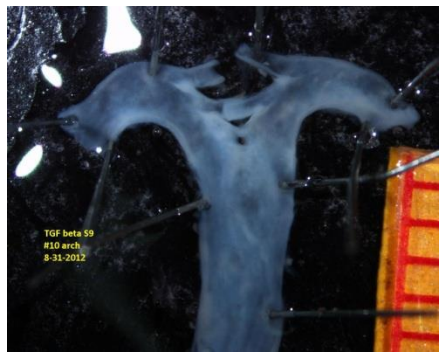

11.4 mm<sup>2</sup>

Study #4: TGF- $\beta$  mouse IgG  
AngII-infusion (1,000 mg/kg/min)

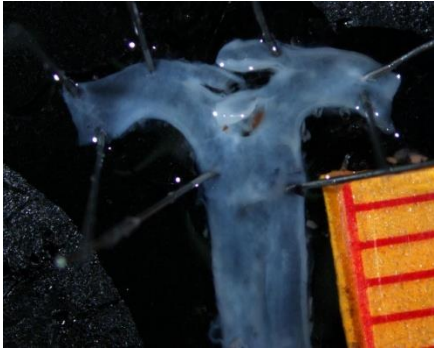

11.8 mm<sup>2</sup>

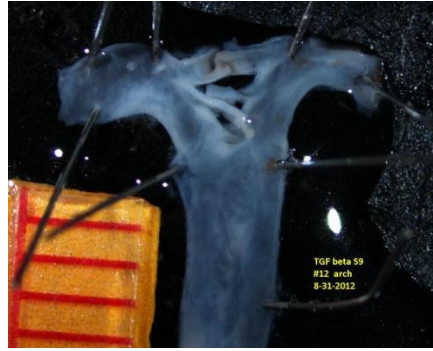

12.3 mm<sup>2</sup>

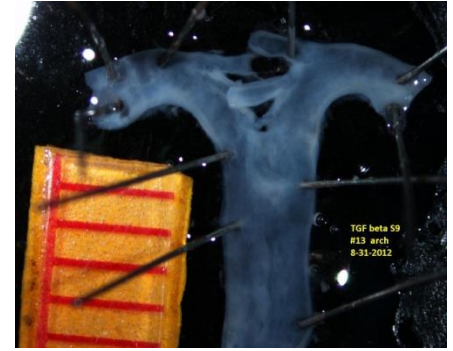

12.1 mm<sup>2</sup>

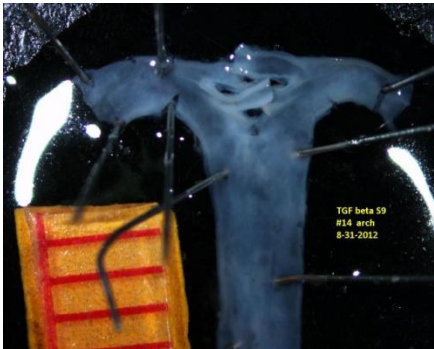

11.3 mm<sup>2</sup>

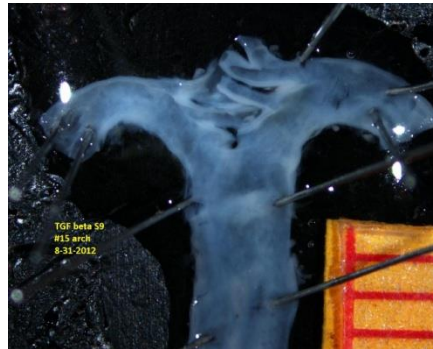

12.9 mm<sup>2</sup>

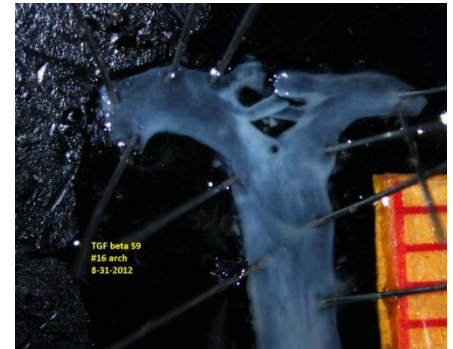

11.0 mm<sup>2</sup>

#17: Died

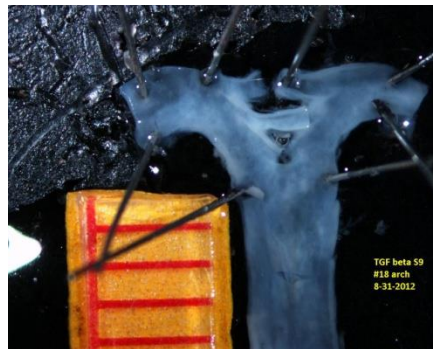

11.4 mm<sup>2</sup>

#19: Died

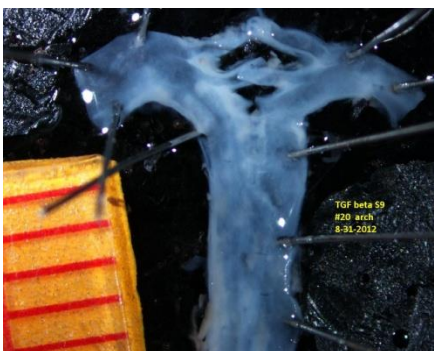

12.4 mm<sup>2</sup>
