# Supplementary material for: TGF-β Neutralization Enhances AngII-Induced Aortic Rupture and Aneurysm in Both Thoracic and Abdominal Regions
Source: PubMed Central journal article supplement (PMC4841552; doi:10.1371/journal.pone.0153811), 2016-04-22
Supplement: pone.0153811.s017.pdf [file pone.0153811.s017.pdf]

# Study #4: Control, isotyped-matched IgG AngII-infusion (1,000 mg/kg/min)

#2:  
Not  
Available

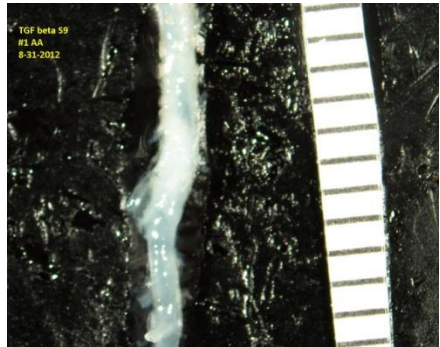

1.24 mm

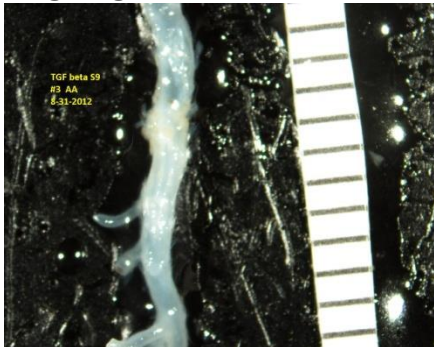

1.11 mm

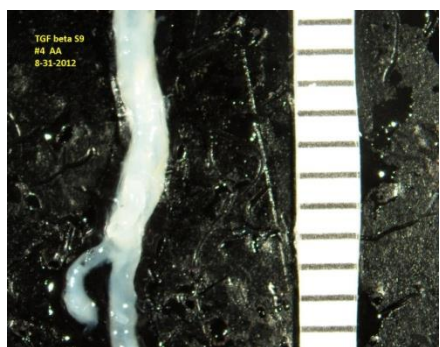

1.16 mm

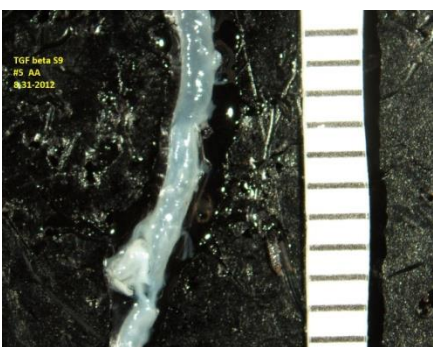

1.13 mm

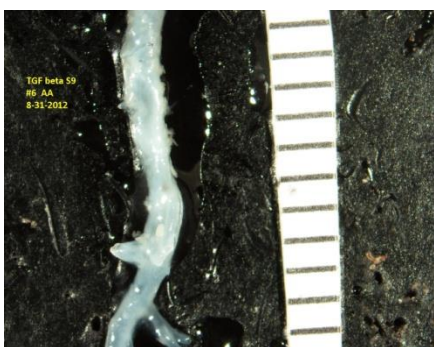

1.15 mm

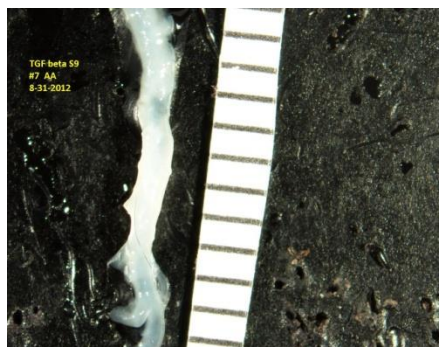

0.88 mm

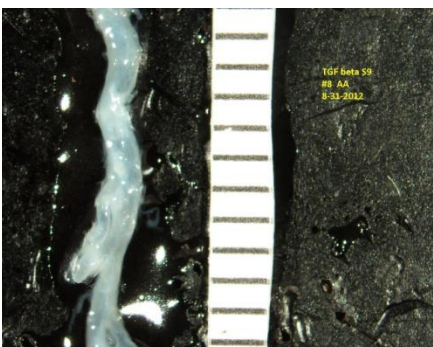

1.10 mm

#9: Died

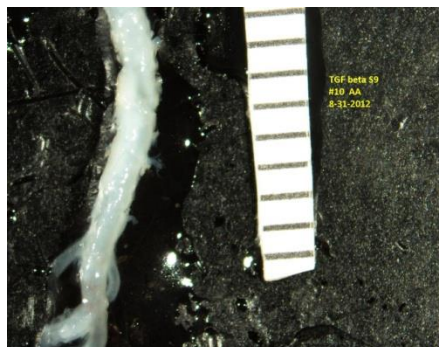

1.19 mm

Study #4: TGF- $\beta$  mouse IgG  
AngII-infusion (1,000 mg/kg/min)

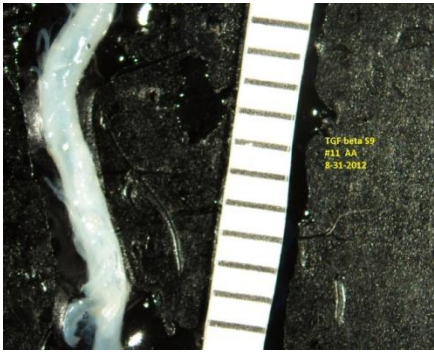

1.19 mm

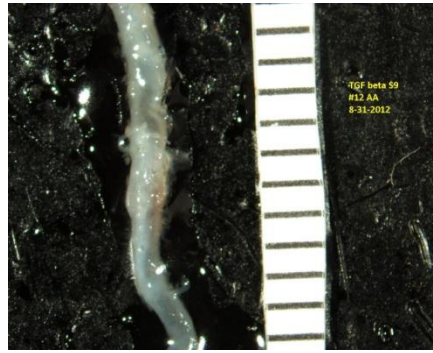

1.36 mm

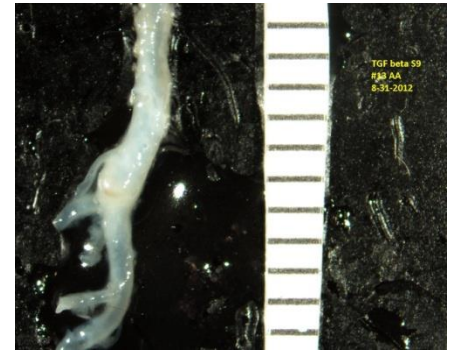

1.54 mm

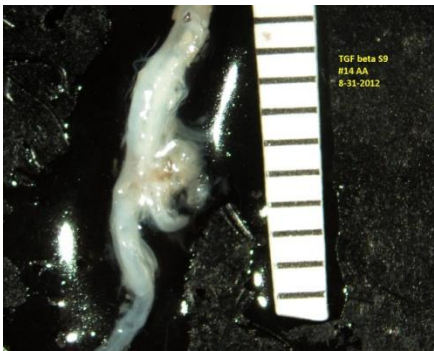

1.94 mm

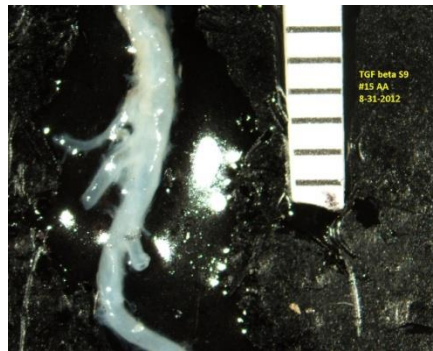

1.12 mm

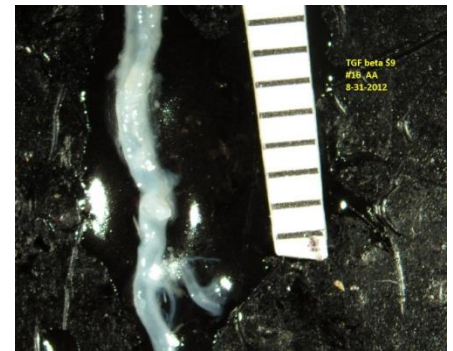

1.06 mm

#17: Died

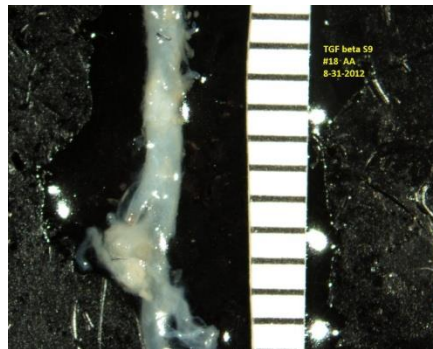

1.23 mm

#19: Died

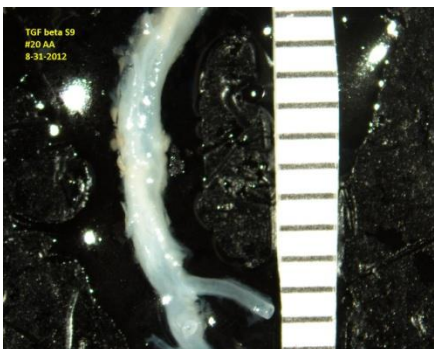

1.30 mm
