# Supplementary material for: TGF-β Neutralization Enhances AngII-Induced Aortic Rupture and Aneurysm in Both Thoracic and Abdominal Regions
Source: PLoS One. 2016 Apr 22;11(4):e0153811. doi: 10.1371/journal.pone.0153811 (PMC4841552; doi:10.1371/journal.pone.0153811)
Supplement: S4 Fig — Arrows denote single time points. Red box denotes continuous infusion in vivo. AngII = Angiotensin II (1,000 mg/kg/min). Ctrl = Isotype-matched control IgG. (PDF) [file pone.0153811.s004.pdf]

Study #4: TGF-β inhibition in mice previously infused with AngII

| Group | Infusion | Injection (i.p.) |                    | N  |
|-------|----------|------------------|--------------------|----|
|       |          | IgG              | Dose               |    |
| 1     | AngII    | Isotype Ctrl     | 5 mg/kg,<br>3/week | 10 |
| 2     | AngII    | TGF-β Ab         |                    | 10 |

|                    | Time (weeks) |   |   |   |     |     |     |     |
|--------------------|--------------|---|---|---|-----|-----|-----|-----|
| Procedure          | 1            | 2 | 3 | 4 | 5   | 6   | 7   | 8   |
| Infusion - AngII   | ↑            |   |   |   | ↑   |     |     |     |
| Ultrasonic scan    |              |   |   | ↑ |     |     |     |     |
| Injection - IgG    |              |   |   |   | ↑↑↑ | ↑↑↑ | ↑↑↑ | ↑↑↑ |
| Serum TGF-β        |              |   |   |   |     |     |     | ↑   |
| Aortic pathologies |              |   |   |   |     |     |     | ↑   |
